# Supplementary material for: Acupuncture for acute musculoskeletal pain management in the emergency department and continuity clinic: a protocol for an adaptive pragmatic randomised controlled trial
Source: PubMed Central journal article supplement — BMJ Open. 2022 Sep 23;12(9):e061661. doi: 10.1136/bmjopen-2022-061661 (PMC9511597; doi:10.1136/bmjopen-2022-061661), 2022-09-23
Supplement: bmjopen-2022-061661.draft_revisions.pdf [file bmjopen-2022-061661.draft_revisions.pdf]

# BMJ Open

BMJ Open is committed to open peer review. As part of this commitment we make the peer review history of every article we publish publicly available.

When an article is published we post the peer reviewers' comments and the authors' responses online. We also post the versions of the paper that were used during peer review. These are the versions that the peer review comments apply to.

The versions of the paper that follow are the versions that were submitted during the peer review process. They are not the versions of record or the final published versions. They should not be cited or distributed as the published version of this manuscript.

BMJ Open is an open access journal and the full, final, typeset and author-corrected version of record of the manuscript is available on our site with no access controls, subscription charges or pay-per-view fees (<http://bmjopen.bmj.com>).

If you have any questions on BMJ Open's open peer review process please email [info.bmjopen@bmj.com](mailto:info.bmjopen@bmj.com)

# BMJ Open

## Emergency Department Acupuncture for Acute Musculoskeletal Pain Management: A Protocol for an Adaptive Pragmatic Randomized Controlled Trial

|                               |                                                                                                                                                                                                                                                                                                                                                                                                                                                                                                                                                                                                                                                                                                                                                                                                                                                                                                                                                                                                                                                                                                                                                                                                                                                                                                                                                                                                                                                                                                                                                                                                                                                                                                                                                                     |
|-------------------------------|---------------------------------------------------------------------------------------------------------------------------------------------------------------------------------------------------------------------------------------------------------------------------------------------------------------------------------------------------------------------------------------------------------------------------------------------------------------------------------------------------------------------------------------------------------------------------------------------------------------------------------------------------------------------------------------------------------------------------------------------------------------------------------------------------------------------------------------------------------------------------------------------------------------------------------------------------------------------------------------------------------------------------------------------------------------------------------------------------------------------------------------------------------------------------------------------------------------------------------------------------------------------------------------------------------------------------------------------------------------------------------------------------------------------------------------------------------------------------------------------------------------------------------------------------------------------------------------------------------------------------------------------------------------------------------------------------------------------------------------------------------------------|
| Journal:                      | <i>BMJ Open</i>                                                                                                                                                                                                                                                                                                                                                                                                                                                                                                                                                                                                                                                                                                                                                                                                                                                                                                                                                                                                                                                                                                                                                                                                                                                                                                                                                                                                                                                                                                                                                                                                                                                                                                                                                     |
| Manuscript ID                 | bmjopen-2022-061661                                                                                                                                                                                                                                                                                                                                                                                                                                                                                                                                                                                                                                                                                                                                                                                                                                                                                                                                                                                                                                                                                                                                                                                                                                                                                                                                                                                                                                                                                                                                                                                                                                                                                                                                                 |
| Article Type:                 | Protocol                                                                                                                                                                                                                                                                                                                                                                                                                                                                                                                                                                                                                                                                                                                                                                                                                                                                                                                                                                                                                                                                                                                                                                                                                                                                                                                                                                                                                                                                                                                                                                                                                                                                                                                                                            |
| Date Submitted by the Author: | 01-Feb-2022                                                                                                                                                                                                                                                                                                                                                                                                                                                                                                                                                                                                                                                                                                                                                                                                                                                                                                                                                                                                                                                                                                                                                                                                                                                                                                                                                                                                                                                                                                                                                                                                                                                                                                                                                         |
| Complete List of Authors:     | <p>Eucker, Stephanie; Duke University School of Medicine, Department of Surgery, Division of Emergency Medicine; Duke University School of Medicine, Department of Orthopaedic Surgery<br/> Glass, Oliver; Duke University School of Medicine, Department of Medicine, Division of General Internal Medicine<br/> Staton, Catherine; Duke University School of Medicine, Department of Surgery, Division of Emergency Medicine; Duke Global Health Institute<br/> Knisely, Mitchell R.; Duke University School of Nursing<br/> O'Regan, Amy; Duke University, Department of Population Health Sciences<br/> De Larco, Christi; Duke University School of Medicine, Department of Surgery, Division of Emergency Medicine<br/> Mill, Michelle; Duke University School of Medicine, Department of Surgery, Division of Emergency Medicine<br/> Dixon, Austin; Duke University School of Medicine, Department of Surgery, Division of Emergency Medicine<br/> TumSuden, Olivia; Duke University School of Medicine, Department of Surgery, Division of Emergency Medicine<br/> Walker, Erica; Duke University School of Medicine, Department of Surgery, Division of Emergency Medicine<br/> Dalton, Juliet C.; Duke University, Duke Office of Clinical Research<br/> Limkakeng, Alexander; Duke University School of Medicine, Department of Surgery, Division of Emergency Medicine<br/> Maxwell, Ann Miller; Durham Veterans Affairs Health Care System<br/> Gordee, Alex; Duke University, Department of Biostatistics and Bioinformatics<br/> Kuchibhatla, Maggie; Duke University, Department of Biostatistics and Bioinformatics; Duke University, Center for Aging<br/> Chow, Sheinchung; Duke University, Department of Biostatistics and Bioinformatics</p> |
| Keywords:                     | Pain management < ANAESTHETICS, ACCIDENT & EMERGENCY MEDICINE, COMPLEMENTARY MEDICINE                                                                                                                                                                                                                                                                                                                                                                                                                                                                                                                                                                                                                                                                                                                                                                                                                                                                                                                                                                                                                                                                                                                                                                                                                                                                                                                                                                                                                                                                                                                                                                                                                                                                               |
|                               |                                                                                                                                                                                                                                                                                                                                                                                                                                                                                                                                                                                                                                                                                                                                                                                                                                                                                                                                                                                                                                                                                                                                                                                                                                                                                                                                                                                                                                                                                                                                                                                                                                                                                                                                                                     |

1  
2  
3  
4  
5  
6  
7  
8  
9  
10  
11  
12  
13  
14  
15  
16  
17  
18  
19  
20  
21  
22  
23  
24  
25  
26  
27  
28  
29  
30  
31  
32  
33  
34  
35  
36  
37  
38  
39  
40  
41  
42  
43  
44  
45  
46  
47  
48  
49  
50  
51  
52  
53  
54  
55  
56  
57  
58  
59  
60

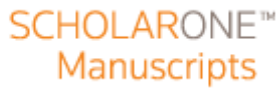

## Title Page

Emergency Department Acupuncture for Acute Musculoskeletal Pain Management: A Protocol for an Adaptive Pragmatic Randomized Controlled Trial

## Authors

Stephanie A. Eucker, MD, PhD<sup>1,2,\*</sup>, [stephanie.eucker@duke.edu](mailto:stephanie.eucker@duke.edu)

Oliver Glass, PhD<sup>3</sup>, [oliver.glass@duke.edu](mailto:oliver.glass@duke.edu)

Catherine A. Staton, MD, MSc<sup>1,4</sup>, [catherine.staton@duke.edu](mailto:catherine.staton@duke.edu)

Mitchell R. Knisely, PhD, RN<sup>5</sup>, [mitchell.knisely@duke.edu](mailto:mitchell.knisely@duke.edu)

Amy O'Regan, MPH<sup>6</sup>, [amy.oregan@duke.edu](mailto:amy.oregan@duke.edu), orchid ID: <https://orcid.org/0000-0001-6788-5673>

Christi De Larco, L.Ac., DACM, [christi@acupunctureindurham.com](mailto:christi@acupunctureindurham.com)

Michelle Mill, RN, LAc, [mailofmill@gmail.com](mailto:mailofmill@gmail.com)

Austin Dixon, DACM, L.Ac., Dipl.OM., [austin@austindixonacupuncture.com](mailto:austin@austindixonacupuncture.com)

Olivia TumSuden, BS<sup>1</sup>, [olivia.tumsuden@duke.edu](mailto:olivia.tumsuden@duke.edu)

Erica Walker BS, MHA<sup>1</sup>, [erica.walker@duke.edu](mailto:erica.walker@duke.edu)

Juliet C. Dalton, MSc<sup>1</sup>, [juliet.dalton@duke.edu](mailto:juliet.dalton@duke.edu)

Alexander T. Limkakeng, Jr., MD, MHSc, FACEP<sup>1</sup>, [alexander.limkakeng@duke.edu](mailto:alexander.limkakeng@duke.edu)

Ann Miller W. Maxwell, MD<sup>7</sup>, [ann.maxwell@va.gov](mailto:ann.maxwell@va.gov)

Alex Gordee, MA<sup>8,9</sup>, [alexander.gordee@duke.edu](mailto:alexander.gordee@duke.edu)

Maggie Kuchibhatla, PhD<sup>8,10</sup>, [maggiek@dm.duke.edu](mailto:maggiek@dm.duke.edu)

Shein-Chung Chow, PhD<sup>8</sup>, [sheinchung.chow@duke.edu](mailto:sheinchung.chow@duke.edu)

## Author affiliations

<sup>1</sup>Duke University, Department of Surgery, Division of Emergency Medicine

<sup>2</sup>Duke University, Department of Orthopedics

<sup>3</sup>Duke University, Department of Medicine, Division of General Internal Medicine

<sup>4</sup>Duke University, Duke Global Health Institute

<sup>5</sup>Duke University School of Nursing

<sup>6</sup>Duke University, Department of Population Health Sciences

<sup>7</sup>Durham Veterans Affairs Health Care System

<sup>8</sup>Duke University, Department of Biostatistics and Bioinformatics

<sup>9</sup>Duke University Biostatistics, Epidemiology, and Research Design Methods Core

<sup>10</sup>Duke University Center for Aging

\*Corresponding author:

Stephanie A. Eucker

[stephanie.eucker@duke.edu](mailto:stephanie.eucker@duke.edu)

Duke University Hospital

2301 Erwin Rd

DUMC 3096

Durham, NC 27710

919-681-0196

1  
2  
3  
4  
5  
6  
7  
8  
9  
10  
11  
12  
13  
14  
15  
16  
17  
18  
19  
20  
21  
22  
23  
24  
25  
26  
27  
28  
29  
30  
31  
32  
33  
34  
35  
36  
37  
38  
39  
40  
41  
42  
43  
44  
45  
46  
47  
48  
49  
50  
51  
52  
53  
54  
55  
56  
57  
58  
59  
60

**Key words:**

- Acupuncture therapy
- Pain management
- Emergency medicine
- Emergency service, hospital
- Musculoskeletal pain

**Word count:** 4660 words

For peer review only

## Abstract

**Introduction:** Chronic musculoskeletal pain causes a significant burden on health and quality of life and may result from inadequate treatment of acute musculoskeletal pain. The Emergency Department (ED) represents a novel setting in which to test nonpharmacologic interventions early in the pain trajectory to prevent the transition from acute to chronic pain. Acupuncture is increasingly recognized as a safe, affordable and effective treatment for pain and anxiety in the clinic setting, but it has yet to be established as a primary treatment option in the ED.

**Methods and analysis:** This pragmatic clinical trial uses a two-stage adaptive randomized design to determine the feasibility, acceptability, and effectiveness of acupuncture initiated in the ED and continued in outpatient clinic for treating acute musculoskeletal pain. The objective of the first (treatment selection) stage is to determine the more effective style of ED-based acupuncture, auricular acupuncture or peripheral acupuncture, as compared to no acupuncture. All arms will receive usual care at the discretion of the ED provider blinded to treatment arm. The objective of the second (effectiveness confirmation) stage is to confirm the impact of the selected acupuncture arm on pain reduction. An interim analysis is planned at the end of Stage 1 based on probability of being the best treatment, after which adaptations will be considered including dropping the less effective arm, sample size re-estimation, and unequal treatment allocation ratio (e.g., 1:2) for Stage 2. Acupuncture treatments will be delivered by licensed acupuncturists in the ED and twice weekly for 1 month afterward in an outpatient clinic.

**Ethics and dissemination:** This study has been reviewed and approved by the Duke University Health System Institutional Review Board. Informed consent will be obtained from all participants. Results will be disseminated through peer review publications and public and conference presentations.

**Trial registration number:** ClinicalTrials.gov: NCT04290741

## Article Summary

### Strengths and limitations of this study

- The two-stage adaptive design of this clinical trial leverages findings from the first stage to inform adaptations in the second stage to increase likelihood of success with implementation and measuring the true effectiveness of acupuncture.
- This study uses two types of acupuncture by licensed acupuncturists: 1) an auricular acupuncture protocol and 2) acupuncture tailored to the individual that is reflective of how acupuncture is actually used clinically, to compare the efficacy, feasibility and acceptability of the two methods.
- The pragmatic design utilizes usual medical care in all arms and necessitates a control group with no sham acupuncture, to better replicate real-world conditions and assessment of acupuncture effectiveness. This design limits assessment of the specific vs non-specific effects of acupuncture on pain outcomes.
- This study extends the scope and assessment of acupuncture effectiveness to a more broadly representative emergency department (ED) population, and longitudinal delivery of acupuncture treatments in both the ED and outpatient clinic will better assess the benefit of multiple sessions for acute pain.
- The breadth of biopsychosocial outcome measures can contribute to a more comprehensive understanding of how acupuncture works for acute musculoskeletal pain and bridging the gap between eastern and western medicine.

## Introduction

Over 40 million adults in the United States (US) suffer from chronic pain, which is pain lasting three months or longer.[1] Musculoskeletal pain, one of the largest subsets of chronic pain conditions, leads to high rates of healthcare utilization, increased opioid use, and poor physical, psychological, and cognitive health.[1] Musculoskeletal pain often results from an acute injury, and if not adequately treated, can transition to a chronic pain condition.[2,3] Significant challenges exist for adequately managing musculoskeletal pain due to the heterogenous nature of its causes and pain symptomatology, and standard treatments are often ineffective.[4,5] Additionally, numerous biological (e.g., inflammatory mediators), psychological (e.g., pain catastrophizing), and social (e.g., social support) factors (referred to collectively as “biopsychosocial” factors) contribute to the complexity of musculoskeletal pain development, severity, progression and disability.[6] Recent studies have begun to explore the role of biopsychosocial factors in the transition from acute to chronic pain and how they may serve as targets for intervention.[3,7] One strategy to prevent the transition from acute to chronic pain is early intervention using nonpharmacologic strategies that influence these biopsychosocial factors. The Emergency Department (ED) represents a novel setting in which to test nonpharmacologic interventions early in the pain trajectory with the goal of preventing the transition from acute to chronic musculoskeletal pain.

Acupuncture is a safe and cost-effective treatment for acute and chronic pain, particularly of the back, neck, and shoulder.[8,9] Furthermore, acupuncture has shown benefit in treating both pain and anxiety,[8] and acts on numerous neural, endogenous opioid and inflammatory pathways,[10] thereby representing a broader biopsychosocial intervention than other single pain treatment modalities. However, data on the use of acupuncture for pain management in the ED is limited since acupuncture practitioners are not currently standard or commonplace in US EDs.[11,12] A recent meta-analysis of ED studies has shown acupuncture to be superior to sham/placebo and equivalent or better than medications for pain reduction.[11,13] Only three small pilot studies have compared acupuncture combined with usual care to usual care alone, with results favoring acupuncture.[11,14] No study has compared different acupuncture protocols (e.g., battlefield/auricular acupuncture and peripheral acupuncture) to determine which is more efficacious, feasible or acceptable in the ED. Moreover, despite evidence that acupuncture is more effective with multiple sessions,[15] prior ED studies have not included a longitudinal outpatient acupuncture component for post-ED pain management or longer-term outcomes.

Therefore, the purpose of this study is to determine the effectiveness, feasibility and acceptability of acupuncture initiated in the Emergency Department (ED) and continued in a group clinic setting for treating acute musculoskeletal pain. The ED population is largely heterogeneous in sociodemographic composition and comprises populations previously excluded from acupuncture studies.[16] A **pragmatic randomized controlled trial** can determine the extent to which ED patients will attend and derive benefit from the full acupuncture experience, while extending the scope and assessment of treatment effectiveness to a more broadly representative patient population. We hypothesize that, when added to usual care, acupuncture initiated in the ED and continued in an outpatient setting for one month is more effective than usual care alone at reducing acute musculoskeletal pain at 1 hour while in the ED and at 1 month after ED visit.



## **METHODS AND ANALYSIS:**

### **Study design**

This pragmatic clinical trial uses a two-stage adaptive randomized design to determine the feasibility, acceptability, and effectiveness of acupuncture initiated in the Emergency Department (ED) for treating acute musculoskeletal pain. The objective of the first (treatment selection) stage is to determine the more effective style of ED-based acupuncture, i.e., Auricular Acupuncture (AA) or Peripheral Acupuncture (PA), as compared to no acupuncture (NA). The objective of the second (effectiveness confirmation) stage is to confirm the impact of the selected acupuncture arm on pain reduction. An interim analysis is planned at the end of Stage 1 based on probability of being the best treatment,[17] after which adaptations will be considered including dropping the less effective arm, sample size re-estimation, and unequal treatment allocation ratio such as 1:2 ratio for effectiveness in Stage 2. Acupuncture treatments will be delivered by licensed acupuncturists in the ED and up to 2 times per week for 1 month afterward in an outpatient clinic. In this pragmatic design, all study arms will receive usual care for pain management at the discretion of the ED provider who will be blinded to treatment arm.

### **Study setting and recruitment**

Trial participants will be recruited from the Duke University Hospital Emergency Department (ED), an urban academic tertiary care referral center in North Carolina with 80,000 ED visits per year. All study screening, recruitment, informed e-consent, and enrollment procedures will be performed by trained clinical research coordinators. Study acupuncturists will be available during enrollment to explain acupuncture treatment to eligible patients. Outpatient acupuncture visits will be scheduled with the study acupuncturists using secure HIPAA-compliant scheduling software and take place at the Duke Integrative Medicine Clinic. Patient recruitment began in February 2020 and is ongoing.

### **Eligibility Criteria**

#### **Inclusion criteria**

Participants must be adult (age 18 years or older) ED patients with pain in the neck, back, arms and/or legs and a clinical diagnosis of acute ( $\leq 7$  days) musculoskeletal pain as determined by an ED provider, and able to read and understand the consent form in English. Participants with acute exacerbation of chronic pain in which the acute component is  $\leq 7$  days will be included, as this is a common ED presentation.[18]

#### **Exclusion criteria**

Patients will be excluded if they are: (1) suspected to have a non-musculoskeletal cause of pain, (2) unable to receive acupuncture due to injury, infection, or other contraindication to the use of needles at acupuncture sites; (3) not possible to attend outpatient clinic (e.g., visiting from out-of-state); (4) unable to provide informed consent or to comprehend or complete study measures or procedures due to cognitive impairment, including evidence of drug, medication or alcohol intoxication, or due to severe hearing or speech impairment; (5) unable to safely participate due to critical illness, obvious bony deformity, other serious medical condition (including active COVID-19 infection), and/or based on ED provider judgment.

## Randomization and Blinding

Subjects will be randomized 1:1:1 to one of three treatment groups: 1) auricular acupuncture (AA), 2) peripheral acupuncture (PA), or 3) the control group with no acupuncture (NA). The randomization code will be computer-generated by the Biostatistics, Epidemiology and Research Design (BERD) Methods Core of the Department of Biostatistics and Bioinformatics, Duke University Medical Center. An unstratified block randomization method will be used to generate the random allocation sequence, which will be stored in a secure electronic file accessible only by the acupuncturists to ensure allocation concealment. The research coordinator enrolling eligible patients will be blinded to the allocation sequence and randomization assignments. After participant baseline measures and acupuncturist initial clinical assessment, the treating acupuncturist will open the randomization file and assign the participant to the treatment group corresponding to the next sequential entry.

The participants and the acupuncturists will not be blinded to their treatment allocation. All other members of the ED clinical and research teams will be blinded. Round stickers will be applied to the ears of all participants at the battlefield protocol sites to blind these members to patient assignment while in the ED. If the participant reports an adverse event, the research coordinator may become unblinded to record and address the event. Due to the adaptive nature of the statistical design, the statisticians and data safety monitoring committee (DSMC) will be unblinded to the control treatment arm in Stage 1 to perform the interim analysis; the statistician analyzing the data will remain blinded to the treatment arms. All other study investigators will remain blinded.

## Interventions

Acupuncture will only be performed by licensed acupuncturists. For this study, two styles of acupuncture designed to increase feasibility in the ED will be employed. (1) Auricular acupuncture (AA) will involve the placement of needles in up to 5 sites on each ear corresponding to the previously developed battlefield acupuncture protocol to treat pain.[19,20] (2) Peripheral acupuncture (PA) will involve the placement of needles in head, neck, arms, legs, hands, and feet sites selected at the clinical discretion of the treating acupuncturist based upon acupuncture diagnosis as the primary mode of therapy.[21,22] Acupuncture sites on the torso (i.e., chest, back and abdomen) will not be used. Both acupuncture groups will receive acupuncture while in the ED. Afterwards, both groups will receive information and free access to acupuncture in an outpatient clinic for up to 2 times a week for 1 month after their ED visit. Our outpatient acupuncture clinic is designed as a group-based clinic modified for COVID-19-related social distancing to enhance access and affordability. All post-ED outpatient acupuncture treatments for both acupuncture groups will involve either PA, AA or both at the clinical discretion of the treating acupuncturist. The specific components of each acupuncture treatment will be recorded in details according to the revised Standards for Reporting Interventions in Clinical Trials of Acupuncture (STRICTA) recommendations.[23] (3) The control group (no acupuncture = NA) will not receive acupuncture in the ED and will be asked not to seek acupuncture treatment for one month after their ED visit. Control group participants will complete assessments only, with the timing and content of their assessments matching those completed by the intervention groups.

1  
2  
3 All participants in the control group and in both acupuncture groups will receive usual care  
4 for acute pain management at the discretion of their ED provider who will remain blinded to  
5 study arm. Usual care may include but is not limited to medications/analgesics,  
6 nonpharmacologic strategies (e.g., ice, heat, walking), and referrals to outpatient specialists  
7 and/or other nonpharmacologic treatment providers (e.g., physical therapy).  
8  
9

## 10 **Outcomes**

11 Outcome measures and biopsychosocial factors will be collected before randomization (ED  
12 baseline), 1 hour after randomization, and at 2 weeks and 1 month post-ED visit.  
13  
14

## 15 **Primary Outcome Measures**

16 The primary ED effectiveness endpoint will be the change in current pain score based on the 0-  
17 10 pain numeric rating scale (NRS) from ED baseline to 1 hour post-randomization. The primary  
18 combined ED-outpatient clinic effectiveness endpoint will be change in 24-hour average NRS  
19 pain score from ED baseline to 1 month post-ED visit.  
20

21 Feasibility will be assessed based on patient recruitment and retention rates both in the ED  
22 and with subsequent one-month follow-up. Acceptability will be assessed based on patient-  
23 reported satisfaction as well as outpatient acupuncture clinic attendance rates, with attention to  
24 reasons for attrition or differential acceptance rates for different groups of participants. Safety  
25 will be evaluated by recording any adverse events (AEs), with common reasons to include  
26 bleeding, bruising, or pain at the needle sites. Serious adverse events (SAEs) are expected to  
27 be extremely rare given previous highly favorable safety data on acupuncture, and include  
28 infections, hospitalizations and deaths.[21,24]  
29  
30  
31

## 32 **Secondary Outcome Measures**

33 Secondary outcomes will include patient function, quality of life, and biopsychosocial factors.  
34

35 Function and quality-of-life will be measured at ED baseline, 2 weeks and 1 month across  
36 several different domains, including pain interference, fatigue, depression, anxiety, sleep  
37 disturbance, physical function, social function, and cognitive function, using the validated  
38 PROMIS-29 and Neuro-QoL instruments.[25,26] Given the acute time course of pain (7 days or  
39 less) for eligible participants, the timeframe for the PROMIS-29 questions will be modified from  
40 “over the past 7 days” to “over the past 24 hours (1 day)” for the ED baseline assessment only.  
41 We will also measure patient-reported medication use, including opioid and non-opioid  
42 medications. Opioid use will be assessed through patient report in the past 24 hours and in the  
43 past 7 days, as well as by electronic medical record (EMR) data extraction of prescriptions  
44 written during and up to one year after the ED visit.  
45  
46

47 A comprehensive set of biopsychosocial factors will be measured at ED baseline and one-  
48 month follow-up. These include:

- 49 (1) Patient demographics including age, sex, race, ethnicity, employment, marital status,  
50 education, income, and insurance status.
- 51 (2) Pain characteristics including anatomical location of pain, duration of current episode of  
52 musculoskeletal pain, and history of prior episodes of musculoskeletal pain.
- 53 (3) Degree and type of social support, including instrumental, informational, and emotional  
54 support, will be measured using the PROMIS Social Support 4-item scales.[27]  
55  
56  
57  
58  
59  
60

1  
2  
3 (4) All non-medical substance use, including opioid misuse, through the validated ASSIST  
4 tool.[28]

5 (5) Presence and severity of chronic pain using a recently validated simplified version of the  
6 graded chronic pain scale derived from the 3-item pain, enjoyment and general activity (PEG)  
7 score and degree of activity limitations.[29,30]

8 (6) Symptoms of systemic pathology will be measured using the validated Optimal Screening for  
9 Prediction of Referral and Outcome Review of Systems (OSPRO-ROS) tool, which predicts pain  
10 outcomes after musculoskeletal care in outpatient physical therapy settings.[31,32]

11 (7) Pain-related psychological distress using the validated concise Optimal Screening for  
12 Prediction of Referral and Outcome Yellow Flag (OSPRO-YF) tool, an assessment tool for  
13 measuring psychological response to pain including pain coping, catastrophizing, fear-  
14 avoidance and mood [32,33].

15 (8) Pain-related emotional distress based on the Perceived Stress Scale (PSS) tool.[34]

16 (7) Pain coping skills using the Coping Skills Questionnaire 2-item form (CSQ-2).[35]

17 (8) Pain self-efficacy using the Pain Self-Efficacy Questionnaire (PSEQ).[36]

18  
19  
20  
21  
22 Two additional measures will be collected in-person in the ED at baseline and 1 hour:

23 (9) Pressure pain threshold, a non-invasive quantitative test of pain sensitivity that measures the  
24 lowest applied pressure needed to evoke to an individual's perception of pain, will be performed  
25 on the bilateral trapezius muscles using slow progressive pressure (1 kg/cm<sup>2</sup>/sec) with a  
26 standard hand-held algometer (Wagner Digital Force Gauge, Wagner Instruments, Greenwich,  
27 CT).[37,38]

28 (10) Blood samples will be collected and stored in a secure repository for future biomarker  
29 analysis of biochemical and genetic pathways involved in pain and response to acupuncture.  
30 Participants may opt out of the blood draw and still participate in the clinical trial.

31  
32  
33  
34  
35 Additional EMR data will be extracted by trained analysts and include medications administered  
36 and prescribed from the ED, opioids prescribed up to one year following index ED visit, return  
37 ED visits and hospitalizations up to 3 months following index ED visit, and ICD-10 codes for  
38 pain conditions and co-occurring diagnoses (e.g., medical and psychiatric comorbidities).

### 39 40 41 **Data Collection and Management**

42 Data will be collected at ED baseline, 1 hour post-randomization, and at 2 weeks and 1 month  
43 post-ED visit, with data entered directly into a REDCap secure electronic database.[39] All in-  
44 person biological measures including pressure pain threshold and blood draws for biomarkers  
45 will be obtained during the ED visit at baseline and 1 hour by research coordinators embedded  
46 in the ED. Pressure pain threshold will be recorded in REDCap. Blood samples will be coded  
47 with a unique study identifier and deidentified for storage.

48  
49 ED baseline and 1-hour questionnaires to collect biopsychosocial factors and outcome  
50 measures will be completed by participants independently and entered directly into REDCap  
51 while they are in the ED (**Figure 1**). Research coordinators will be available for assistance with  
52 data entry if requested by participants. Participants will be contacted at 2 weeks and 1 month  
53 post-ED visit to complete online REDCap follow-up surveys (**Figure 1**) using follow-up  
54 procedures to facilitate maximum study retention. These procedures include up to three  
55  
56  
57  
58  
59  
60

automated electronic follow-up surveys sent via email, automated text message links to the surveys, follow-up phone calls by ED research assistants with the option to complete surveys by phone, and compensation for one-month follow-up assessment completion.

Acupuncturist assessments and treatment details in the ED and outpatient clinic will be entered directly into REDCap forms by the treating acupuncturist. ED medication data will be entered into REDCap forms by research coordinators. Acupuncture AEs and SAEs will be entered into REDCap forms by the study personnel notified of the event, and follow-up of the events will be completed within the same forms by the personnel completing follow-ups. Additional EMR data will be extracted by trained analysts and stored in a protected analytics environment. All data will be stored for at least 5 years after study completion for primary and ancillary studies, with access restricted to study staff, and is included in patient consent. To protect confidentiality, no personal information will be shared.

### Sample size

For Stage 1, a total of 90 subjects (30 subjects per arm) will be used to (i) assess feasibility based on patient recruitment and retention rates, and (ii) determine the more effective arm at the ED one-hour timepoint for moving forward to Stage 2 for effectiveness confirmation. Sample size calculation for achieving Stage 2 study objectives assumed<sup>[17,40,41]</sup>: (1) a Stage 2 two-arm parallel design with 1:2 control:treatment allocation; (2) the primary endpoint is normally distributed; (3) with no acupuncture, a mean pain score of 6.5 with a standard deviation of 2.5;<sup>[42]</sup> (4) a minimally clinically meaningful difference in pain score of 1.3;<sup>[42]</sup> (5) a power of 90.0%; and (6) a 5% level of significance. This yielded a total sample size of 198 subjects (**Table 1**) at the end of Stage 2. To account for a possible 10% dropout rate requires increasing the total number enrolled to 220 subjects.

**Table 1. Sample Size Estimation and Allocation**

| Stage   | Randomization | Sample Size               | Total |
|---------|---------------|---------------------------|-------|
| Stage 1 | 1:1:1         | 30 (NA), 30 (AA), 30 (PA) | 90    |
| Stage 2 | 1:2           | 36 (NA), 72 (AA or PA)    | 108   |
|         |               | Total                     | 198   |

### Data Analysis and Statistical Methods

**Population:** The primary analysis will be performed based on the intention-to-treat (ITT) population, which is defined as all randomized subjects who have at least one follow-up evaluation regardless of their compliance with the protocol. In case of a substantial number of protocol violations, additional per-protocol analyses may be performed to determine whether they influence the conclusions.

**General Analysis Conventions/Rules:** Descriptive statistics for continuous variables will be provided as: number of subjects, means and standard deviations, medians and interquartile ranges, and minima and maxima. Descriptive statistics for discrete (categorical) variables will be provided as the number and percentage of subjects in each category. Time to event variables will be provided using Kaplan-Meier survival curve estimates. Unless otherwise noted, any tests of hypotheses are two-sided, and the nominal level of significance will be 5%.



1  
2  
3  
4 Handling of Missing Data: Imputation of missing data will be handled depending on the  
5 missingness mechanism.  
6

7  
8 Baseline Comparability: Number of subjects randomized, completing the study and reasons for  
9 discontinuation will be summarized by treatment group. Patient demographics and baseline  
10 characteristics including biopsychosocial factors will be tabulated and compared for treatment  
11 group differences. All comparisons will be performed by using the Cochran-Mantel-Haenszel  
12 (CMH) test for categorical variables and two-way analysis of variance for continuous variables.  
13  
14

15 Primary Analysis: The primary variable, change in pain score from ED baseline to 1 hour post-  
16 randomization, will be evaluated and compared between treatment groups. The corresponding  
17 95% confidence interval for the difference in mean response rate between treatment groups will  
18 be obtained using analysis of variance (ANOVA).  
19  
20

21 Secondary Analyses: Responder analysis will also be performed using a logistic regression  
22 analysis that incorporates potential risk factors identified for response. Point estimate and the  
23 corresponding 95% confidence interval of odds ratios for the identified risk factors will also be  
24 obtained. In addition, the Stuart-Maxwell test may be performed to examine changes (or shifts)  
25 from baseline to follow-ups after ED discharge.  
26  
27

28 Exploratory Analyses: Exploratory analyses such as biomarker changes pre to one-hour post-  
29 randomization, subgroup analyses based on patient demographics and/or patient  
30 characteristics, and predictive model building, validation, and/or generalizability may be  
31 conducted as deemed appropriate by the principal investigator(s), biostatistician or as  
32 recommended by an internal established data safety monitoring committee (DSMC). These  
33 include secondary analyses of the impact on outcomes of the number of acupuncture needle  
34 sites or number of acupuncture pathways used, number of clinic visits attended, within  
35 treatment pain and/or anxiety reductions, among others. If possible, additional exploratory  
36 models predicting response to acupuncture based on biopsychosocial factors will be examined.  
37  
38  
39  
40

41 Safety Analysis: Table will show the AEs ordered by decreasing frequency for all participants.  
42 Separate tabulations will summarize the AEs by seriousness, severity, and possible association  
43 with study drug. If appropriate, the incidence rate of AEs will be compared by Fisher's Exact  
44 Test. Special attention will be given to those subjects who have discontinued due to AEs and  
45 those subjects who experienced a SAE.  
46  
47

48 Interim Analysis: There will be one planned interim analysis which will take place when two-  
49 thirds of subjects (i.e., 20 of 30 subjects per arm) have completed Stage 1. At interim analysis,  
50 the feasibility will be assessed based on patient recruitment and retention rates, and the more  
51 effective arm will be determined based on change in pain score at the one-hour ED timepoint  
52 based on probability of being the more effective treatment.[17] Some adaptations such as  
53 modifying current treatment arm, different randomization scheme, additional interim analyses,  
54 and/or sample size re-estimation may be applied as recommended by the DSMC.  
55  
56  
57  
58  
59  
60

### **Data Monitoring**

A data safety monitoring committee (DSMC) comprised of an independent biostatistician, emergency medicine physician-researcher and a medical acupuncturist-pain medicine clinician will meet at least 2 times per year with ad hoc reports as needed, to monitor the safety and performance quality of the trial. The DSMC will also evaluate the interim analysis to make recommendations on adaptations for Stage 2 to the study investigators.

AEs and SAEs and their follow ups will be recorded in a secure REDCap file. AEs will be reviewed weekly, and SAEs will be reviewed immediately by the principal investigator and lead research coordinator and addressed as needed. All SAEs will be reported within 24 hours to the DSMC, IRB and study sponsor.

### **Ethics considerations and Dissemination plan**

The Duke University Health System Institutional Review Board has reviewed and approved this study (Protocol # Pro00104140). This trial was registered on 2/7/2020 with clinicaltrials.gov (registration # NCT04290741) and released to the public on 2/28/2020. We used the SPIRIT checklist when writing our report.[43] Upon completion of the trial, the results will be disseminated through peer review publications as well as presentations at professional organization conferences and to the public including healthcare organizations.

### **Patient and Public Involvement**

Patients and the public were not involved in the original design of the study. However, patient participants will be interviewed for feedback on their acupuncture and research experience to potentially inform future adaptations.

### **Discussion**

Adaptive design: The innovative adaptive design of this study enables findings from the first stage to be used to increase the likelihood of success in the second stage for measuring the true effectiveness of acupuncture in an ED population. Adaptations to drop the least effective arm and/or mitigate issues that arise in Stage 1 are designed to optimize implementation of acupuncture for both the study and its broader applicability to other settings.[44] Efforts will be made to limit potential bias from adaptations and maintain trial integrity and validity by utilizing an independent DSMC to decide on any adaptations.

Novel care pathways: This will be one of the first randomized trials to integrate acupuncture into ED care and to establish linkages to outpatient acupuncture treatment. It will also be one of the first acupuncture studies to include a diverse sociodemographic population and to utilize a group-based clinic to enhance access and affordability of this treatment option.[16] Patient knowledge of, access to, and availability of nonpharmacologic therapies are frequent barriers to use.[16,45] Post-ED follow-up can be particularly challenging among ED patients due to cost and time constraints, so lowering these barriers are key to improving access to care. Furthermore, initial therapeutic experience with acupuncture has been shown to increase patient follow-through with continued acupuncture,[46] highlighting the benefit of combining ED with outpatient care. Goals of the study include reducing patient need for pain medications,

1  
2  
3 particularly opioids, and return ED visits for pain control through use of acupuncture. Our  
4 findings will inform future ED and follow-up acupuncture treatment recommendations.  
5

6  
7 Tailoring Acupuncture to the ED environment: Comparing auricular acupuncture (AA) to  
8 peripheral acupuncture (PA) in the ED setting is a key component of our study, as it allows  
9 further exploration of the feasibility and acceptability of ED-based acupuncture through two  
10 different patient experiences. AA can be delivered quickly, easily, and without removal of  
11 clothing, thus fitting well within the space and time constraints of the ED environment.[19]  
12 Furthermore, specific types of auricular needles can be left in place for later self-stimulation by  
13 patients to provide additional pain relief for an additional 1-5 days.[19,47] Use of AA can be  
14 limited by patient discomfort with needles in the ear, potential compatibility issues with obtaining  
15 CT and MRI imaging while needles are in place, and lack of clinical guidelines for its use.  
16

17  
18 Peripheral acupuncture (PA) allows for greater personalization of treatment than AA by  
19 offering a much larger number of meridians or channels that the acupuncturist can access for  
20 pain relief.[48,49] PA also offers the flexibility to adapt treatments for very anxious or needle-  
21 sensitive patients because needle depth and level of stimulation can be modified to suit  
22 individual needs. While tight clothing may limit the number of accessible acupuncture points,  
23 this is typically not a major barrier for experienced acupuncturists.  
24

25 While PA can take longer for the patient, 20-45 minutes for PA compared with 10-20  
26 minutes for AA, spending more time with the acupuncturist can contribute to their increased  
27 sense of support and better anxiety relief. In addition, PA can be more efficient for the  
28 acupuncturist than AA when treating multiple patients, as the acupuncturist can leave one  
29 patient while needles are in place to tend to the next patient, returning later for needle removal  
30 and session completion. By contrast, AA involves frequent patient reassessments between each  
31 needle insertion requiring the acupuncturist's full attention until session completion before  
32 proceeding to the next patient. Lastly, while the battlefield protocol was developed and used by  
33 the military and VA to be simple enough to train non-acupuncturists to use it, outside of the  
34 military both AA and PA can only be performed by licensed and trained acupuncturists.[20-22]  
35  
36  
37

38 Usual care for ED pain management: The choice of usual care for all treatment arms was based  
39 on the goal of developing a practical and feasible intervention in the ED setting where  
40 medications are expected by patients but can be variably prescribed among providers.[50,51]  
41 Therefore, restriction of medications from any one arm could be perceived as undesirable or  
42 unethical by ED patients seeking care. In addition, choice of medication can depend on many  
43 factors, including provider and patient preferences, and allergies, adverse reactions, or  
44 contraindications to specific medications. Therefore, in order to increase the applicability of our  
45 findings, the decision was made to allow provider judgement to dictate medication choice as  
46 well as dosing. This has the added benefit of managing breakthrough pain through usual ED  
47 provider reassessment and repeat dosing as deemed clinically appropriate. ED providers were  
48 kept blinded to treatment arm so that their usual clinical judgement determined usual care  
49 treatment. Thus, the results of this trial will reflect the results expected in actual clinical practice  
50 in an academic ED.  
51  
52  
53

54 The choice of no acupuncture for the control group as compared with sham or other placebo  
55 was based on the goal of studying the effect of acupuncture in a pragmatic setting. Given the  
56  
57  
58



1  
2  
3 high volume, high throughput environment of most US EDs, there is not a typical usual care  
4 option that would equate to a placebo or sham intervention. For instance, most EDs do not have  
5 the time or resources to routinely provide another nonpharmacologic practitioner or additional  
6 ED staff member who could devote extra time for patient support. Thus, the alternative to  
7 acupuncture in most settings would simply be no acupuncture, with a focus on medication  
8 prescriptions, supportive care, and/or, less commonly, outpatient referrals (e.g., primary care,  
9 physical therapist, orthopedist) for further management.  
10  
11

12  
13 **Breadth of Study Outcomes:** This study will also generate data on biopsychosocial factors to  
14 better characterize the population of patients seen in the ED for acute musculoskeletal pain.  
15 Exploration of these factors may also identify mediators of the patient response to acupuncture.  
16 These mediators may help identify patients more likely to improve with acupuncture and/or  
17 better elucidate potential mechanisms of acupuncture's therapeutic effects. Findings from this  
18 study will further our understanding of acute pain and its nonpharmacologic management  
19 through acupuncture, as well as their associations with the comprehensive set of  
20 biopsychosocial factors.  
21  
22  
23  
24  
25  
26

### 27 **Acknowledgements**

28 The authors are grateful to Tara Bianca Rado for her input as a licensed acupuncturist on the  
29 design and acupuncture treatment details of this study. We are also grateful to Andrew Bouffler,  
30 Lauren McGowan and Tedra Porter for informing the study design through their experience and  
31 insight as clinical research coordinators.  
32  
33  
34  
35

### 36 **Author contributions**

37 SAE drafted the study protocol manuscript. OG, CAS, and MRK participated in the design of the  
38 study and revising the protocol manuscript. SC, MK and AG were responsible for the statistical  
39 design of the study and revising the protocol manuscript. CDL, MM, AD, AMM and ATL provided  
40 clinical advice and made critical revisions to the protocol and manuscript. EW, AO, OCT and JD  
41 were involved as clinical research coordinators in revising and editing the protocol and  
42 manuscript. SAE is principal investigator of the study and is responsible for making final  
43 decisions on the trial design and manuscript preparation. All authors approved the final  
44 manuscript.  
45  
46  
47

48 **Protocol version:** 1.27, Date 02/25/2021  
49

### 50 **Funding**

51 This project is supported by The Substance Abuse and Mental Health Services Administration  
52 (SAMHSA) Emergency Department Alternatives to Opioids Demonstration Program (ED-ALT)  
53 Grant number H79TI083109.  
54  
55  
56  
57  
58  
59

1  
2  
3 This project is included as part of the Duke School of Medicine Opioid Collaboratory which is  
4 administered through the Duke Department of Population Health Sciences and supported by  
5 grant funding from the Duke Endowment. The Collaboratory's mission is to save lives and  
6 reduce the harmful impact of opioids in North Carolina through the development,  
7 implementation, and/or evaluation of system-level interventions.  
8  
9

10 The Duke Biostatistics, Epidemiology, and Research Design Core's support was made possible  
11 by the CTSA Grant (UL1TR002553) from the National Center for Advancing Translational  
12 Sciences (NCATS) of the NIH and the NIH Roadmap for Medical Research. This report's  
13 contents are solely the responsibility of the authors and do not represent the official views of  
14 NCATS or NIH.  
15  
16

17 The study funders had no role in the study design, collection or analysis of data.  
18  
19

### 20 **Competing interests**

21 None declared.  
22  
23

### 24 **Patient consent**

25 Obtained.  
26  
27

### 28 **Ethics approval**

29 The Duke University Health System Institutional Review Board has reviewed and approved this  
30 study on January 29, 2020 (Protocol No: Pro00104140).  
31  
32

### 33 **Data availability statement**

34 Not applicable.  
35  
36  
37  
38  
39  
40  
41  
42  
43  
44  
45  
46  
47  
48  
49  
50  
51  
52  
53  
54  
55  
56  
57  
58  
59  
60

## Bibliography

- 1 Pitcher MH, Von Korff M, Bushnell MC, *et al.* Prevalence and Profile of High-Impact Chronic Pain in the United States. *J Pain* 2019;**20**:146–60. doi:10.1016/j.jpain.2018.07.006
- 2 Friedman BW, Conway J, Campbell C, *et al.* Pain One Week After an Emergency Department Visit for Acute Low Back Pain Is Associated With Poor Three-month Outcomes. *Acad Emerg Med* 2018;**25**:1138–45. doi:10.1111/acem.13453
- 3 Stevans JM, Delitto A, Khoja SS, *et al.* Risk factors associated with transition from acute to chronic low back pain in US patients seeking primary care. *JAMA Netw Open* 2021;**4**:e2037371. doi:10.1001/jamanetworkopen.2020.37371
- 4 Chou R, Deyo R, Friedly J, *et al.* Systemic pharmacologic therapies for low back pain: A systematic review for an american college of physicians clinical practice guideline. *Ann Intern Med* 2017;**166**:480–92. doi:10.7326/M16-2458
- 5 Busse JW, Sadeghirad B, Oparin Y, *et al.* Management of Acute Pain From Non-Low Back Musculoskeletal Injuries : A Systematic Review and Network Meta-analysis of Randomized Trials. *Ann Intern Med* Published Online First: 18 August 2020. doi:10.7326/M19-3601
- 6 Edwards RR, Dworkin RH, Sullivan MD, *et al.* The role of psychosocial processes in the development and maintenance of chronic pain. *J Pain* 2016;**17**:T70-92. doi:10.1016/j.jpain.2016.01.001
- 7 Kent ML, Tighe PJ, Belfer I, *et al.* The ACTION-APS-AAPM Pain Taxonomy (AAAPT) Multidimensional Approach to Classifying Acute Pain Conditions. *J Pain* 2017;**18**:479–89. doi:10.1016/j.jpain.2017.02.421
- 8 Fan AY, Miller DW, Bolash B, *et al.* Acupuncture's Role in Solving the Opioid Epidemic: Evidence, Cost-Effectiveness, and Care Availability for Acupuncture as a Primary, Non-Pharmacologic Method for Pain Relief and Management-White Paper 2017. *J Integr Med* 2017;**15**:411–25. doi:10.1016/S2095-4964(17)60378-9
- 9 Chow SC. *Quantitative Methods for Traditional Chinese Medicine Development*. New York: : Chapman and Hall/CRC Press, Taylor & Francis 2015.
- 10 McDonald JL, Cripps AW, Smith PK. Mediators, Receptors, and Signalling Pathways in the Anti-Inflammatory and Antihyperalgesic Effects of Acupuncture. *Evid Based Complement Alternat Med* 2015;**2015**:975632. doi:10.1155/2015/975632
- 11 Jan AL, Aldridge ES, Rogers IR, *et al.* Review article: Does acupuncture have a role in providing analgesia in the emergency setting? A systematic review and meta-analysis. *Emerg Med Australas* 2017;**29**:490–8. doi:10.1111/1742-6723.12832
- 12 Chia KL, Lam RPK, Lam CK, *et al.* Acupuncture in the emergency department: a systematic review of randomised controlled trials. *Acupunct Med* 2018;**36**:183–92. doi:10.1136/acupmed-2017-011547
- 13 Grissa MH, Baccouche H, Boubaker H, *et al.* Acupuncture vs intravenous morphine in the management of acute pain in the ED. *Am J Emerg Med* 2016;**34**:2112–6. doi:10.1016/j.ajem.2016.07.028
- 14 Goertz CMH, Niemtow R, Burns SM, *et al.* Auricular acupuncture in the treatment of acute pain syndromes: A pilot study. *Mil Med* 2006;**171**:1010–4. doi:10.7205/MILMED.171.10.1010
- 15 Kligler B, Nielsen A, Kohrherr C, *et al.* Acupuncture therapy in a group setting for chronic

- 1  
2  
3 pain. *Pain Med* 2018;**19**:393–403. doi:10.1093/pm/pnx134
- 4 16 Baker K, McDonald J, Steel A. Tackling health inequity: a commentary on the potential of  
5 acupuncture to improve health outcomes of marginalised populations. *Acupunct Med*  
6 2020;:964528420961404. doi:10.1177/0964528420961404
- 7  
8 17 Zheng J, Chow S-C. Criteria for dose-finding in two-stage seamless adaptive design. *J*  
9 *Biopharm Stat* 2019;**29**:908–19. doi:10.1080/10543406.2019.1657130
- 10 18 McLeod D, Nelson K. The role of the emergency department in the acute management of  
11 chronic or recurrent pain. *Australas Emerg Nurs J* 2013;**16**:30–6.  
12 doi:10.1016/j.aenj.2012.12.001
- 13 19 Niemtzw RC. Battlefield Acupuncture. *Med Acupunct* 2007;**19**:225–8.  
14 doi:10.1089/acu.2007.0603
- 15 20 Federman DG, Zeliadt SB, Thomas ER, *et al*. Battlefield acupuncture in the veterans health  
16 administration: effectiveness in individual and group settings for pain and pain  
17 comorbidities. *Med Acupunct* 2018;**30**:273–8. doi:10.1089/acu.2018.1296
- 18 21 Hempel S, Taylor SL, Solloway MR, *et al*. *Evidence map of acupuncture*. Washington (DC):  
19 : Department of Veterans Affairs 2014.
- 20 22 North Carolina Acupuncture Licensing Board. General Information: Fundamental  
21 Information About Acupuncture. North Carolina Acupuncture Licensing Board Website.  
22 <https://www.ncalb.com/general-information/> (accessed 31 Mar2021).
- 23 23 MacPherson H, Altman DG, Hammerschlag R, *et al*. Revised STandards for Reporting  
24 Interventions in Clinical Trials of Acupuncture (STRICTA): Extending the CONSORT  
25 statement. *J Evid Based Med* 2010;**3**:140–55. doi:10.1111/j.1756-5391.2010.01086.x
- 26 24 Weidenhammer W, Streng A, Linde K, *et al*. Acupuncture for chronic pain within the  
27 research program of 10 German Health Insurance Funds--basic results from an  
28 observational study. *Complement Ther Med* 2007;**15**:238–46.  
29 doi:10.1016/j.ctim.2006.09.005
- 30 25 Cella D, Riley W, Stone A, *et al*. The Patient-Reported Outcomes Measurement Information  
31 System (PROMIS) developed and tested its first wave of adult self-reported health outcome  
32 item banks: 2005-2008. *J Clin Epidemiol* 2010;**63**:1179–94.  
33 doi:10.1016/j.jclinepi.2010.04.011
- 34 26 Cella D, Lai JS, Nowinski CJ, *et al*. Neuro-QOL: brief measures of health-related quality of  
35 life for clinical research in neurology. *Neurology* 2012;**78**:1860–7.  
36 doi:10.1212/WNL.0b013e318258f744
- 37 27 Hahn EA, DeWalt DA, Bode RK, *et al*. New English and Spanish social health measures  
38 will facilitate evaluating health determinants. *Health Psychol* 2014;**33**:490–9.  
39 doi:10.1037/hea0000055
- 40 28 Humeniuk R, Henry-Edwards S, Ali R, *et al*, editors. *The Alcohol, Smoking and Substance*  
41 *Involvement Screening Test (ASSIST): Manual for use in primary care*. 2010.  
42 [https://www.who.int/substance\\_abuse/publications/assist/en/](https://www.who.int/substance_abuse/publications/assist/en/) (accessed 2 Dec2019).
- 43 29 Krebs EE, Lorenz KA, Bair MJ, *et al*. Development and initial validation of the PEG, a three-  
44 item scale assessing pain intensity and interference. *J Gen Intern Med* 2009;**24**:733–8.  
45 doi:10.1007/s11606-009-0981-1
- 46 30 Von Korff M, DeBar LL, Krebs EE, *et al*. Graded chronic pain scale revised: mild,  
47 bothersome, and high-impact chronic pain. *Pain* 2020;**161**:651–61.  
48  
49  
50  
51  
52  
53  
54  
55  
56  
57  
58  
59  
60

- doi:10.1097/j.pain.0000000000001758
- 31 George SZ, Beneciuk JM, Bialosky JE, *et al.* Development of a Review-of-Systems Screening Tool for Orthopaedic Physical Therapists: Results From the Optimal Screening for Prediction of Referral and Outcome (OSPRO) Cohort. *J Orthop Sports Phys Ther* 2015;**45**:512–26. doi:10.2519/jospt.2015.5900
- 32 George SZ, Beneciuk JM, Lentz TA, *et al.* Optimal screening for prediction of referral and outcome (OSPRO) for musculoskeletal pain conditions: results from the validation cohort. *J Orthop Sports Phys Ther* 2018;**48**:460–75. doi:10.2519/jospt.2018.7811
- 33 Lentz TA, Beneciuk JM, Bialosky JE, *et al.* Development of a yellow flag assessment tool for orthopaedic physical therapists: results from the optimal screening for prediction of referral and outcome (OSPRO) cohort. *J Orthop Sports Phys Ther* 2016;**46**:327–43. doi:10.2519/jospt.2016.6487
- 34 Cohen S, Kamarck T, Mermelstein R. A global measure of perceived stress. *J Health Soc Behav* 1983;**24**:385–96. doi:10.2307/2136404
- 35 Jensen MP, Keefe FJ, Lefebvre JC, *et al.* One- and two-item measures of pain beliefs and coping strategies. *Pain* 2003;**104**:453–69. doi:10.1016/S0304-3959(03)00076-9
- 36 Nicholas MK. The pain self-efficacy questionnaire: Taking pain into account. *Eur J Pain* 2007;**11**:153–63. doi:10.1016/j.ejpain.2005.12.008
- 37 Cruz-Almeida Y, Fillingim RB. Can quantitative sensory testing move us closer to mechanism-based pain management? *Pain Med* 2014;**15**:61–72. doi:10.1111/pme.12230
- 38 Persson AL, Brogårdh C, Sjölund BH. Tender or not tender: test-retest repeatability of pressure pain thresholds in the trapezius and deltoid muscles of healthy women. *J Rehabil Med* 2004;**36**:17–27. doi:10.1080/16501970310015218
- 39 Harris PA, Taylor R, Thielke R, *et al.* Research electronic data capture (REDCap)--a metadata-driven methodology and workflow process for providing translational research informatics support. *J Biomed Inform* 2009;**42**:377–81. doi:10.1016/j.jbi.2008.08.010
- 40 Chow SC, Chang M. *Adaptive Design Methods in Clinical Trials*. 2nd ed. New York: : Chapman and Hall/CRC Press, Taylor & Francis 2011.
- 41 Chow S-C, Wang H, Shao J. *Sample size calculations in clinical research*. Chapman and Hall/CRC 2007. doi:10.1201/9781584889830
- 42 Gallagher EJ, Liebman M, Bijur PE. Prospective validation of clinically important changes in pain severity measured on a visual analog scale. *Ann Emerg Med* 2001;**38**:633–8. doi:10.1067/mem.2001.118863
- 43 Chan A-W, Tetzlaff JM, Gøtzsche PC, *et al.* SPIRIT 2013 explanation and elaboration: guidance for protocols of clinical trials. *BMJ* 2013;**346**:e7586. doi:10.1136/bmj.e7586
- 44 Chow S-C. Adaptive clinical trial design. *Annu Rev Med* 2014;**65**:405–15. doi:10.1146/annurev-med-092012-112310
- 45 Becker WC, Dorflinger L, Edmond SN, *et al.* Barriers and facilitators to use of non-pharmacological treatments in chronic pain. *BMC Fam Pract* 2017;**18**:41. doi:10.1186/s12875-017-0608-2
- 46 Thomas ER, Zeliadt SB, Coggeshall S, *et al.* Does offering battlefield acupuncture lead to subsequent use of traditional acupuncture? *Med Care* 2020;**58 Suppl 2 9S**:S108–15. doi:10.1097/MLR.0000000000001367
- 47 Council of Colleges of Acupuncture and Oriental Medicine. *Clean Needle Technique*

- 1  
2  
3 *Manual*. 7th ed. United States: 2020. [https://www.ccaom.org/ccaom/CNT\\_Manual.asp](https://www.ccaom.org/ccaom/CNT_Manual.asp)  
4 (accessed 6 Apr2021).  
5  
6 48 Dorsher PT. Myofascial referred-pain data provide physiologic evidence of acupuncture  
7 meridians. *J Pain* 2009;**10**:723–31. doi:10.1016/j.jpain.2008.12.010  
8  
9 49 Nielsen A, Anderson B, Citkovitz C, *et al*. Developing and employing a “responsive  
10 manualization” in the “Acupuncture Approaches to Decrease Disparities in Outcomes of  
11 Pain Treatment” comparative effectiveness study. *Acupunct Med* 2019;**37**:184–91.  
12 doi:10.1177/0964528419834015  
13  
14 50 Lee WW, Burelbach AE, Fosnocht D. Hispanic and non-Hispanic white patient pain  
15 management expectations. *Am J Emerg Med* 2001;**19**:549–50.  
16 doi:10.1053/ajem.2001.28038  
17  
18 51 Hoppe JA, McStay C, Sun BC, *et al*. Emergency department attending physician variation  
19 in opioid prescribing in low acuity back pain. *West J Emerg Med* 2017;**18**:1135–42.  
20 doi:10.5811/westjem.2017.7.33306  
21  
22  
23  
24  
25  
26  
27  
28  
29  
30  
31  
32  
33  
34  
35  
36  
37  
38  
39  
40  
41  
42  
43  
44  
45  
46  
47  
48  
49  
50  
51  
52  
53  
54  
55  
56  
57  
58  
59  
60

1  
2  
3 **Figure captions:**  
4

5 **Figure 1.** Trial flowchart. After interim analysis in Stage 1, the less effective  
6 acupuncture arm will be dropped.  
7  
8  
9

10 **Appendix 1.** Example informed consent form  
11  
12  
13  
14  
15  
16  
17  
18  
19  
20  
21  
22  
23  
24  
25  
26  
27  
28  
29  
30  
31  
32  
33  
34  
35  
36  
37  
38  
39  
40  
41  
42  
43  
44  
45  
46  
47  
48  
49  
50  
51  
52  
53  
54  
55  
56  
57  
58  
59  
60

For peer review only



Figure 1. Trial flowchart

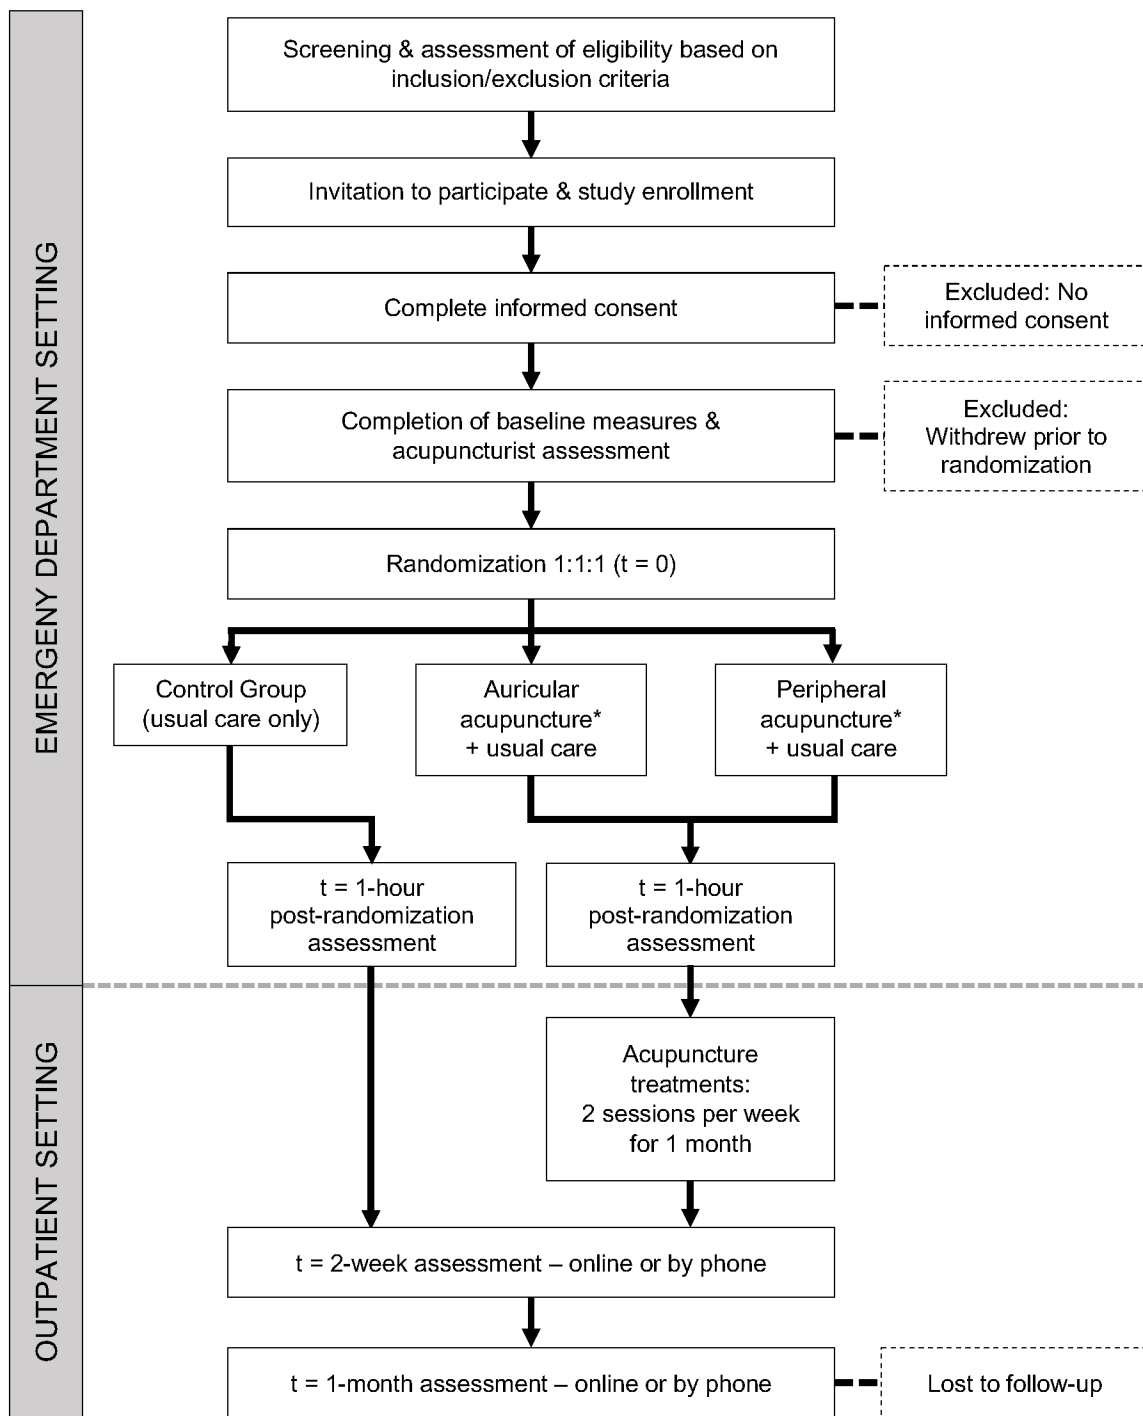



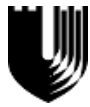**Consent to Participate in a Research Study**

Emergency Department Acupuncture for Musculoskeletal Pain Management

**CONCISE SUMMARY**

The purpose of this study is to measure how well acupuncture (the insertion of very thin needles through your skin at strategic points on your body) improves pain and function, as well as its feasibility, acceptability, and safety in the Emergency Department (ED).

If you agree to participate in this study, you will have an initial assessment with a pain threshold test, study questionnaires, and optional blood draw. You will be randomly assigned to receive either one of two types of acupuncture or no acupuncture. Acupuncture will be performed by a North Carolina Licensed Acupuncturist while in the ED. One hour after your group assignment you will complete a second pain threshold test, study questionnaires, and optional blood draw. After your ED visit, if you are assigned to acupuncture you will attend acupuncture at an outpatient clinic twice a week for 4 weeks. You will be asked to complete questionnaires at 2 and 4 weeks after your ED visit. If you are assigned no acupuncture, you will be asked not to receive any acupuncture for 4 weeks after your ED visit, and you will only complete the questionnaires. Your data and samples collected for this study may be stored and shared for future research.

Risks associated with acupuncture include pain at the site of needle insertion, bruising, and bleeding. There are risks related to loss of confidentiality, but every effort will be made to safeguard your information.

If you are interested in learning more about this study, please continue reading below.

You are being asked to take part in this research study because you presented to the Emergency Department with a musculoskeletal pain (pain that affects the muscles, bones, and/or tissues that connect them).

Research studies are voluntary and include only people who choose to take part. Please read this consent form carefully and take your time making your decision. As your study doctor or study staff discusses this consent form with you, please ask him/her to explain any words or information that you do not clearly understand. We encourage you to talk with your family and friends before you decide to take part in this research study. The nature of the study, risks, inconveniences, discomforts, and other important information about the study are listed below.

Please tell the study doctor or staff if you are taking part in another research study.

**WHO WILL BE MY DOCTOR ON THIS STUDY?**

If you decide to participate, Dr. Stephanie Eucker will be your doctor for the study and will be in contact with your regular health care provider throughout the time that you are in the study and afterwards, if needed. This study is sponsored by the Duke Endowment and the Substance Abuse and Mental Health Services Administration (SAMHSA).



## Consent to Participate in a Research Study

Emergency Department Acupuncture for Musculoskeletal Pain Management

### WHY IS THIS STUDY BEING DONE?

Musculoskeletal pain is one of the most common reasons for doctors' office and emergency department visits. Painful episodes can lead to significant disability and ongoing disruption of daily functioning.

Acupuncture involves the insertion of very thin needles through your skin at strategic points on your body. It is not well-understood how acupuncture works, but there is some evidence that it is safe and cost-effective in outpatient settings for management of acute and chronic pain, particularly of the back, neck, and shoulder. Acupuncture is most often used to treat pain and anxiety in the clinic setting, but has not routinely been used in the ED.

The goal of this study is to measure how well acupuncture relieves pain and improves function, as well as its feasibility, acceptability, and safety in the ED.

### HOW MANY PEOPLE WILL TAKE PART IN THIS STUDY?

Approximately 750 people will take part in this study at Duke.

### WHAT IS INVOLVED IN THE STUDY?

If you agree to be in this study, you will be asked to sign and date this consent form. If you sign this form electronically, you will be asked to provide your email address so that a copy of it can be emailed to you. By providing your email address for use in the consent process, you are at potential risk for a loss of confidentiality because email is not a secure means of communication.

You will undergo an Initial Assessment that includes the following:

- Pressure Pain Threshold test. This is a non-invasive test that uses a device that applies pressure to your body (shoulder muscle) to measure the amount of pressure that causes mild pain.
- Blood draw for biomarker measurements that is optional (approximately 3-4 teaspoons)
- Completion of questionnaires

You will be randomly assigned, like drawing numbers from a hat, to one of three groups listed below. You have an equal chance of being assigned to each group and a 2 out of 3 chance of getting acupuncture.

- Ear (auricular) acupuncture – placement of needles in up to 10 sites total in both ears
- Peripheral acupuncture – placement of needles in up to 30 specific sites in the head, neck, arms from the shoulders to the hands, and legs from the knees to the feet
- Control – no acupuncture

The acupuncture treatments will be performed in an Emergency Department examination room by a North Carolina Licensed Acupuncturist. Acupuncture consists of inserting single use, sterile, acupuncture needles, measuring 0.16-0.22mm in thickness (about the thickness of a hair) and varying in length from 1.5-5cm (0.5-2 inches). The skin will be cleansed prior to needle insertion, and needles will be placed utilizing clean needle technique. Needle insertion depth will vary between 0.5 cm (0.2 inches) and 4.5 cm (1.8 inches) (through the skin and sometimes muscle layers only), depending on the area of

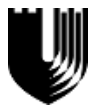**Consent to Participate in a Research Study****Emergency Department Acupuncture for Musculoskeletal Pain Management**

treatment. Needles will be retained for up to 30 minutes. Auricular acupuncture needles are much smaller, 0.15 cm (0.06 inches) in length (only through the skin), attached to a bandaid adhesive so they can be retained for up to 4 days. All needles can be removed earlier at your request. All acupuncture performed adheres to the guidelines of Clean Needle Technique as required by North Carolina law.

Regardless of which group you are assigned to, you will also receive the usual care for musculoskeletal pain, including medications and other non-medication pain treatments such as ice/heat at the discretion your ED doctor.

You will receive the usual care for acute pain management as determined by your ED doctor. If you are assigned to the control group you will not receive acupuncture. If you are assigned to one of the acupuncture groups, you will receive acupuncture in the ED. The session will last approximately 15-30 minutes.

One hour after you have been assigned to a treatment group you will be asked to complete a brief questionnaire, a pressure pain threshold test, and have an optional second blood draw (3-4 teaspoons) for research for future biomarker analysis.

Blood collection for biomarkers in this study is optional. Biomarkers are substances in the body that can be indicators of a disease. You do not have to allow for research blood draws to participate in this study. If you agree to blood collection, samples will be taken during and one hour after completion of the initial assessment in the ED.

Please initial below indicating whether or not you agree to research blood draws.

\_\_\_\_\_ Yes, I agree to undergo a blood draw for research purposes.

\_\_\_\_\_ No, I do not want to undergo a blood draw for research purposes.

If you are assigned to an acupuncture group, we will provide you with information and free access to group-based acupuncture in the outpatient Integrative Medicine clinic for the next 4 weeks. There will be two sessions per week, and each session will last approximately 30 minutes. You will be asked to provide your phone number and email address to schedule your acupuncture visits. Your name and contact information will be entered into an online scheduling program, Microsoft Bookings. This program will be used to schedule your acupuncture appointments and send appointment reminders.

If you are assigned to the control group, you will not receive acupuncture in the ED, and we ask that you not receive acupuncture for 4 weeks after you sign this consent form. Current research supports that acupuncture will still be effective in treating pain after that time, should you choose to seek acupuncture treatment after participation in the study.

**Consent to Participate in a Research Study****Emergency Department Acupuncture for Musculoskeletal Pain Management**

Regardless of which group you are assigned to, you will be asked to complete questionnaires about your pain, pain management, and quality of life at 2 and 4 weeks after your ED visit. You will receive emails at these time points with a link to the study questionnaires. If you have not completed these within a few days of receiving the email you may be contacted by a member of the study team via text message and/or phone to ensure you are able to access the link. If you have trouble with the link or prefer to answer by phone the questionnaires may be completed via phone.

You may be asked to complete an interview via phone. Interviews will be conducted by a member of the study team. We will ask you questions about your experience with the study and research study materials. This interview will last approximately 15 to 30 minutes. The interviews will be recorded. Recordings may contain your name and age. Your interview will be transcribed within 2 to 3 months and any identifying information will be deleted. Recordings will be stored until the data analysis for this study is complete, approximately 2 years, at which time they will be deleted. Recordings and transcriptions of interviews will be stored in a secure folder that only the study team has access to.

**HOW LONG WILL I BE IN THIS STUDY?**

If you agree to be in this study, your participation will last approximately 4 weeks. You can choose to stop participating at any time without penalty or loss of any benefits to which you are entitled. However, if you decide to stop participating in the study, we encourage you to talk to your doctor first.

**WHAT ARE THE RISKS OF THE STUDY?**

Acupuncture may occasionally result in slight bruising, pain at the site of needle insertion, and bleeding, dizziness, and numbness or tingling near the needling sites that may last a few days.

Infection, excess bleeding, or fainting are also possible, although unlikely.

Risks associated with drawing blood from your arm include momentary discomfort and/or bruising. Infection, excess bleeding, clotting, or fainting are also possible, although unlikely.

There is also a risk of loss of confidentiality of your private information. Every effort will be made to protect your information, but this cannot be guaranteed. By providing your email address you are at potential risk for a loss of confidentiality because email is not a secure means of communication.

**ARE THERE BENEFITS TO TAKING PART IN THE STUDY?**

There may be direct medical benefits to you for participating in this study. If you are assigned to an acupuncture group, you may have decreased pain but that cannot be guaranteed. A potential benefit of this study is to gain knowledge that may lead to improved pain management in the ED in the future. If you are randomized to the no acupuncture group there is no expected benefit above standard of care.

**WILL MY INFORMATION BE KEPT CONFIDENTIAL?**

Participation in research involves some loss of privacy. We will do our best to make sure that information about you is kept confidential, but we cannot guarantee total confidentiality. By providing your email address for use in the consent process, you are at risk for a loss of confidentiality because

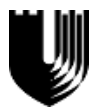

## Consent to Participate in a Research Study

### Emergency Department Acupuncture for Musculoskeletal Pain Management

email is not a secure means of communication. Your personal information may be viewed by individuals involved in this research and may be seen by people including those collaborating, funding, and regulating the study. Your date of birth, dates related to your ED visit, acupuncture visits, and any tests or procedures you have had will be collected for this study. Your name, phone number, and email address will be shared with Microsoft Bookings. We will share only the minimum necessary information in order to conduct the research. Your personal information may also be shared if required by law.

Your records may be reviewed in order to meet federal or state regulations. Reviewers may include representatives from the Food and Drug Administration, the Substance Abuse and Mental Health Services Administration (SAMHSA), the Duke University Health System Institutional Review Board, and others as appropriate. If any of these groups review your research record, they may also need to review your entire medical record.

The study results will be retained in your research record for at least six years after the study is completed.

While the information and data resulting from this study may be presented at scientific meetings or published in a scientific journal, your identity will not be revealed.

Some recipients who receive your health information might not have to follow the same privacy rules. Once your information is shared outside of DUHS, we cannot guarantee that it will remain private. If you decide to share private information with anyone not involved in the study, the federal law designed to protect your health information privacy may no longer apply to the information you have shared. Other laws may or may not protect sharing of private health information.

### WHAT ARE THE COSTS TO YOU?

You or your insurance provider will be responsible and billed for all costs related to your routine medical care, including copayments and deductibles. Routine medical care services are those that you would have received for your condition if you were not participating in this research study. Not all services are covered by insurance. The amount of your out-of-pocket expense will depend on your insurance plan.

Services and procedures that are done solely for research purposes will be paid for by the study. This includes the cost of both inpatient and outpatient acupuncture and costs related to blood draws (if applicable). Please talk with the PI/study team about the specific services and procedures that will be paid for, and the ones for which you or your insurance will be responsible.

We will monitor your DUHS patient care charges to make sure that costs are directed appropriately. If you have any questions or concerns about appropriate billing, contact your study team coordinator so that he/she can help find a resolution.



**Consent to Participate in a Research Study**

Emergency Department Acupuncture for Musculoskeletal Pain Management

**WHAT ABOUT COMPENSATION?**

You will receive a \$30 Amazon gift card after you complete the 4-week follow up survey. Gift cards may be sent via email or text message after the surveys have been completed.

**WHAT ABOUT RESEARCH RELATED INJURIES?**

Immediate necessary medical care is available at Duke University Medical Center in the event that you are injured as a direct result of your participation in this research study. However, there is no commitment by Duke University, Duke University Health System, Inc., or your Duke physicians to provide monetary compensation or free medical care to you in the event of a study-related injury.

For questions about the study or research-related injury, contact Dr. Eucker at 919-684-5537 during regular business hours and at 919-684-8111 after hours and on weekends and holidays and ask that she be paged.

**WHAT ABOUT MY RIGHTS TO DECLINE PARTICIPATION OR WITHDRAW FROM THE STUDY?**

You may choose not to be in the study, or, if you agree to be in the study, you may withdraw from the study at any time. If you withdraw from the study, no new data about you will be collected for study purposes unless the data concerns an adverse event (a bad effect) related to the study. If such an adverse event occurs, we may need to review your entire medical record. All data that has already been collected will be maintained.

Your decision not to participate or to withdraw from the study will not involve any penalty or loss of benefits to which you are entitled and will not affect your access to health care at Duke. If you do decide to withdraw from the research study, we ask that you contact Dr. Eucker in writing and let her know that you are withdrawing from the study. Her mailing address is DUMC Box 3096, Durham, NC, 27710.

We will tell you about new information that may affect your health, welfare, or willingness to stay in this study.

Your study doctor may decide to take you off this study if she determines that it is no longer in your best interest to continue.

If you agree to allow your blood to be kept for future research with identifying information that could link your sample to you, you are free to change your mind at any time. We ask that you contact Dr. Eucker in writing and let her know you are withdrawing your permission for your identifiable blood samples to be used for future research. Her mailing address is listed above. At that time, we will ask you to indicate in writing if you want the unused identifiable blood destroyed or if your samples (having all identifying information removed that would link the sample to you) could be used for other research.

Your samples and data may be stored and shared for future research without additional informed consent if identifiable private information, such as your name and medical record number, are removed. If your

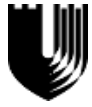

# DUKE UNIVERSITY HEALTH SYSTEM

## Consent to Participate in a Research Study

### Emergency Department Acupuncture for Musculoskeletal Pain Management

identifying information is removed from your samples or data, we will no longer be able to identify and destroy them.

A description of this clinical trial will be available on <https://clinicaltrials.gov/> as required by U.S. Law. This Web site will not include information that can identify you. At most, the Web site will include a summary of the results. You can search this Web site at any time.

#### WHOM DO I CALL IF I HAVE QUESTIONS OR PROBLEMS?

For questions about the study or a research-related injury, or if you have problems, concerns, questions or suggestions about the research, contact Dr. Eucker at 919-684-5537 during regular business hours and at 919-684-8111 after hours and on weekends and holidays and ask that she be paged.

For questions about your rights as a research participant, to discuss problems, concerns or suggestions related to the research, or to obtain information or offer input about the research, contact the Duke University Health System Institutional Review Board (IRB) Office at (919) 668-5111.

#### STATEMENT OF CONSENT

"The purpose of this study, procedures to be followed, risks and benefits have been explained to me. I have been allowed to ask questions, and my questions have been answered to my satisfaction. I have been told whom to contact if I have questions, to discuss problems, concerns, or suggestions related to the research, or to obtain information or offer input about the research. I have read this consent form and agree to be in this study, with the understanding that I may withdraw at any time. I have been told that I will be given a signed and dated copy of this consent form."

\_\_\_\_\_  
Signature of Subject

\_\_\_\_\_  
Date

\_\_\_\_\_  
Time

\_\_\_\_\_  
Signature of Witness (if applicable)

\_\_\_\_\_  
Date

\_\_\_\_\_  
Time

\_\_\_\_\_  
Signature of Person Obtaining Consent

\_\_\_\_\_  
Date

\_\_\_\_\_  
Time

# Reporting checklist for protocol of a clinical trial.

Based on the SPIRIT guidelines.

## Instructions to authors

Complete this checklist by entering the page numbers from your manuscript where readers will find each of the items listed below.

Your article may not currently address all the items on the checklist. Please modify your text to include the missing information. If you are certain that an item does not apply, please write "n/a" and provide a short explanation.

Upload your completed checklist as an extra file when you submit to a journal.

In your methods section, say that you used the SPIRIT reporting guidelines, and cite them as:

Chan A-W, Tetzlaff JM, Gøtzsche PC, Altman DG, Mann H, Berlin J, Dickersin K, Hróbjartsson A, Schulz KF, Parulekar WR, Krleža-Jerić K, Laupacis A, Moher D. SPIRIT 2013 Explanation and Elaboration: Guidance for protocols of clinical trials. *BMJ*. 2013;346:e7586

|                                             |                     | Reporting Item                                                                                               | Page Number |
|---------------------------------------------|---------------------|--------------------------------------------------------------------------------------------------------------|-------------|
| <b>Administrative information</b>           |                     |                                                                                                              |             |
| Title                                       | <a href="#">#1</a>  | Descriptive title identifying the study design, population, interventions, and, if applicable, trial acronym | 1           |
| Trial registration                          | <a href="#">#2a</a> | Trial identifier and registry name. If not yet registered, name of intended registry                         | 2           |
| Trial registration: data set                | <a href="#">#2b</a> | All items from the World Health Organization Trial Registration Data Set                                     | 1-15        |
| Protocol version                            | <a href="#">#3</a>  | Date and version identifier                                                                                  | 14          |
| Funding                                     | <a href="#">#4</a>  | Sources and types of financial, material, and other support                                                  | 14-15       |
| Roles and responsibilities: contributorship | <a href="#">#5a</a> | Names, affiliations, and roles of protocol contributors                                                      | 14          |



|    |                           |                     |                                                                      |       |
|----|---------------------------|---------------------|----------------------------------------------------------------------|-------|
| 1  | Roles and                 | <a href="#">#5b</a> | Name and contact information for the trial sponsor                   | 14-15 |
| 2  | responsibilities:         |                     |                                                                      |       |
| 3  | sponsor contact           |                     |                                                                      |       |
| 4  | information               |                     |                                                                      |       |
| 5  |                           |                     |                                                                      |       |
| 6  |                           |                     |                                                                      |       |
| 7  |                           |                     |                                                                      |       |
| 8  | Roles and                 | <a href="#">#5c</a> | Role of study sponsor and funders, if any, in study design;          | 15    |
| 9  | responsibilities:         |                     | collection, management, analysis, and interpretation of data;        |       |
| 10 | sponsor and funder        |                     | writing of the report; and the decision to submit the report for     |       |
| 11 |                           |                     | publication, including whether they will have ultimate authority     |       |
| 12 |                           |                     | over any of these activities                                         |       |
| 13 |                           |                     |                                                                      |       |
| 14 |                           |                     |                                                                      |       |
| 15 |                           |                     |                                                                      |       |
| 16 | Roles and                 | <a href="#">#5d</a> | Composition, roles, and responsibilities of the coordinating centre, | 12    |
| 17 | responsibilities:         |                     | steering committee, endpoint adjudication committee, data            |       |
| 18 | committees                |                     | management team, and other individuals or groups overseeing the      |       |
| 19 |                           |                     | trial, if applicable (see Item 21a for data monitoring committee)    |       |
| 20 |                           |                     |                                                                      |       |
| 21 |                           |                     |                                                                      |       |
| 22 |                           |                     |                                                                      |       |
| 23 | <b>Introduction</b>       |                     |                                                                      |       |
| 24 |                           |                     |                                                                      |       |
| 25 | Background and            | <a href="#">#6a</a> | Description of research question and justification for undertaking   | 5     |
| 26 | rationale                 |                     | the trial, including summary of relevant studies (published and      |       |
| 27 |                           |                     | unpublished) examining benefits and harms for each intervention      |       |
| 28 |                           |                     |                                                                      |       |
| 29 |                           |                     |                                                                      |       |
| 30 | Background and            | <a href="#">#6b</a> | Explanation for choice of comparators                                | 5     |
| 31 | rationale: choice of      |                     |                                                                      |       |
| 32 | comparators               |                     |                                                                      |       |
| 33 |                           |                     |                                                                      |       |
| 34 |                           |                     |                                                                      |       |
| 35 |                           |                     |                                                                      |       |
| 36 | Objectives                | <a href="#">#7</a>  | Specific objectives or hypotheses                                    | 5     |
| 37 |                           |                     |                                                                      |       |
| 38 | Trial design              | <a href="#">#8</a>  | Description of trial design including type of trial (eg, parallel    | 6     |
| 39 |                           |                     | group, crossover, factorial, single group), allocation ratio, and    |       |
| 40 |                           |                     | framework (eg, superiority, equivalence, non-inferiority,            |       |
| 41 |                           |                     | exploratory)                                                         |       |
| 42 |                           |                     |                                                                      |       |
| 43 |                           |                     |                                                                      |       |
| 44 |                           |                     |                                                                      |       |
| 45 | <b>Methods:</b>           |                     |                                                                      |       |
| 46 | <b>Participants,</b>      |                     |                                                                      |       |
| 47 | <b>interventions, and</b> |                     |                                                                      |       |
| 48 | <b>outcomes</b>           |                     |                                                                      |       |
| 49 |                           |                     |                                                                      |       |
| 50 |                           |                     |                                                                      |       |
| 51 | Study setting             | <a href="#">#9</a>  | Description of study settings (eg, community clinic, academic        | 6     |
| 52 |                           |                     | hospital) and list of countries where data will be collected.        |       |
| 53 |                           |                     | Reference to where list of study sites can be obtained               |       |
| 54 |                           |                     |                                                                      |       |
| 55 |                           |                     |                                                                      |       |
| 56 |                           |                     |                                                                      |       |
| 57 | Eligibility criteria      | <a href="#">#10</a> | Inclusion and exclusion criteria for participants. If applicable,    | 6     |
| 58 |                           |                     | eligibility criteria for study centres and individuals who will      |       |
| 59 |                           |                     |                                                                      |       |
| 60 |                           |                     |                                                                      |       |

perform the interventions (eg, surgeons, psychotherapists)

|    |                      |                      |                                                                       |
|----|----------------------|----------------------|-----------------------------------------------------------------------|
| 1  |                      |                      |                                                                       |
| 2  |                      |                      |                                                                       |
| 3  | Interventions:       | <a href="#">#11a</a> | Interventions for each group with sufficient detail to allow          |
| 4  | description          |                      | replication, including how and when they will be administered         |
| 5  |                      |                      |                                                                       |
| 6  | Interventions:       | <a href="#">#11b</a> | Criteria for discontinuing or modifying allocated interventions for   |
| 7  | modifications        |                      | a given trial participant (eg, drug dose change in response to harms, |
| 8  |                      |                      | participant request, or improving / worsening disease)                |
| 9  |                      |                      |                                                                       |
| 10 |                      |                      |                                                                       |
| 11 | Interventions:       | <a href="#">#11c</a> | Strategies to improve adherence to intervention protocols, and any    |
| 12 | adherence            |                      | procedures for monitoring adherence (eg, drug tablet return;          |
| 13 |                      |                      | laboratory tests)                                                     |
| 14 |                      |                      |                                                                       |
| 15 |                      |                      |                                                                       |
| 16 | Interventions:       | <a href="#">#11d</a> | Relevant concomitant care and interventions that are permitted or     |
| 17 | concomitant care     |                      | prohibited during the trial                                           |
| 18 |                      |                      |                                                                       |
| 19 |                      |                      |                                                                       |
| 20 |                      |                      |                                                                       |
| 21 | Outcomes             | <a href="#">#12</a>  | Primary, secondary, and other outcomes, including the specific        |
| 22 |                      |                      | measurement variable (eg, systolic blood pressure), analysis metric   |
| 23 |                      |                      | (eg, change from baseline, final value, time to event), method of     |
| 24 |                      |                      | aggregation (eg, median, proportion), and time point for each         |
| 25 |                      |                      | outcome. Explanation of the clinical relevance of chosen efficacy     |
| 26 |                      |                      | and harm outcomes is strongly recommended                             |
| 27 |                      |                      |                                                                       |
| 28 |                      |                      |                                                                       |
| 29 |                      |                      |                                                                       |
| 30 | Participant timeline | <a href="#">#13</a>  | Time schedule of enrolment, interventions (including any run-ins      |
| 31 |                      |                      | and washouts), assessments, and visits for participants. A            |
| 32 |                      |                      | schematic diagram is highly recommended (see Figure)                  |
| 33 |                      |                      |                                                                       |
| 34 |                      |                      |                                                                       |
| 35 |                      |                      |                                                                       |
| 36 | Sample size          | <a href="#">#14</a>  | Estimated number of participants needed to achieve study              |
| 37 |                      |                      | objectives and how it was determined, including clinical and          |
| 38 |                      |                      | statistical assumptions supporting any sample size calculations       |
| 39 |                      |                      |                                                                       |
| 40 |                      |                      |                                                                       |
| 41 | Recruitment          | <a href="#">#15</a>  | Strategies for achieving adequate participant enrolment to reach      |
| 42 |                      |                      | target sample size                                                    |
| 43 |                      |                      |                                                                       |
| 44 |                      |                      |                                                                       |

## Methods: Assignment of interventions (for controlled trials)

|    |                      |                      |                                                                      |
|----|----------------------|----------------------|----------------------------------------------------------------------|
| 45 |                      |                      |                                                                      |
| 46 |                      |                      |                                                                      |
| 47 |                      |                      |                                                                      |
| 48 |                      |                      |                                                                      |
| 49 |                      |                      |                                                                      |
| 50 | Allocation: sequence | <a href="#">#16a</a> | Method of generating the allocation sequence (eg, computer-          |
| 51 | generation           |                      | generated random numbers), and list of any factors for               |
| 52 |                      |                      | stratification. To reduce predictability of a random sequence,       |
| 53 |                      |                      | details of any planned restriction (eg, blocking) should be provided |
| 54 |                      |                      | in a separate document that is unavailable to those who enrol        |
| 55 |                      |                      | participants or assign interventions                                 |
| 56 |                      |                      |                                                                      |
| 57 |                      |                      |                                                                      |
| 58 |                      |                      |                                                                      |
| 59 |                      |                      |                                                                      |
| 60 |                      |                      |                                                                      |

|    |                        |                      |                                                                       |       |
|----|------------------------|----------------------|-----------------------------------------------------------------------|-------|
| 1  | Allocation concealment | <a href="#">#16b</a> | Mechanism of implementing the allocation sequence (eg, central        | 7     |
| 2  | mechanism              |                      | telephone; sequentially numbered, opaque, sealed envelopes),          |       |
| 3  |                        |                      | describing any steps to conceal the sequence until interventions are  |       |
| 4  |                        |                      | assigned                                                              |       |
| 5  |                        |                      |                                                                       |       |
| 6  |                        |                      |                                                                       |       |
| 7  |                        |                      |                                                                       |       |
| 8  | Allocation:            | <a href="#">#16c</a> | Who will generate the allocation sequence, who will enrol             | 7     |
| 9  | implementation         |                      | participants, and who will assign participants to interventions       |       |
| 10 |                        |                      |                                                                       |       |
| 11 | Blinding (masking)     | <a href="#">#17a</a> | Who will be blinded after assignment to interventions (eg, trial      | 7     |
| 12 |                        |                      | participants, care providers, outcome assessors, data analysts), and  |       |
| 13 |                        |                      | how                                                                   |       |
| 14 |                        |                      |                                                                       |       |
| 15 |                        |                      |                                                                       |       |
| 16 |                        |                      |                                                                       |       |
| 17 | Blinding (masking):    | <a href="#">#17b</a> | If blinded, circumstances under which unblinding is permissible,      | 7     |
| 18 | emergency unblinding   |                      | and procedure for revealing a participant's allocated intervention    |       |
| 19 |                        |                      | during the trial                                                      |       |
| 20 |                        |                      |                                                                       |       |
| 21 |                        |                      |                                                                       |       |
| 22 | <b>Methods: Data</b>   |                      |                                                                       |       |
| 23 | <b>collection,</b>     |                      |                                                                       |       |
| 24 | <b>management, and</b> |                      |                                                                       |       |
| 25 | <b>analysis</b>        |                      |                                                                       |       |
| 26 |                        |                      |                                                                       |       |
| 27 |                        |                      |                                                                       |       |
| 28 |                        |                      |                                                                       |       |
| 29 | Data collection plan   | <a href="#">#18a</a> | Plans for assessment and collection of outcome, baseline, and other   | 9-10  |
| 30 |                        |                      | trial data, including any related processes to promote data quality   |       |
| 31 |                        |                      | (eg, duplicate measurements, training of assessors) and a             |       |
| 32 |                        |                      | description of study instruments (eg, questionnaires, laboratory      |       |
| 33 |                        |                      | tests) along with their reliability and validity, if known. Reference |       |
| 34 |                        |                      | to where data collection forms can be found, if not in the protocol   |       |
| 35 |                        |                      |                                                                       |       |
| 36 |                        |                      |                                                                       |       |
| 37 |                        |                      |                                                                       |       |
| 38 |                        |                      |                                                                       |       |
| 39 | Data collection plan:  | <a href="#">#18b</a> | Plans to promote participant retention and complete follow-up,        | 9-10  |
| 40 | retention              |                      | including list of any outcome data to be collected for participants   |       |
| 41 |                        |                      | who discontinue or deviate from intervention protocols                |       |
| 42 |                        |                      |                                                                       |       |
| 43 |                        |                      |                                                                       |       |
| 44 | Data management        | <a href="#">#19</a>  | Plans for data entry, coding, security, and storage, including any    | 9-10  |
| 45 |                        |                      | related processes to promote data quality (eg, double data entry;     |       |
| 46 |                        |                      | range checks for data values). Reference to where details of data     |       |
| 47 |                        |                      | management procedures can be found, if not in the protocol            |       |
| 48 |                        |                      |                                                                       |       |
| 49 |                        |                      |                                                                       |       |
| 50 |                        |                      |                                                                       |       |
| 51 | Statistics: outcomes   | <a href="#">#20a</a> | Statistical methods for analysing primary and secondary outcomes.     | 10-11 |
| 52 |                        |                      | Reference to where other details of the statistical analysis plan can |       |
| 53 |                        |                      | be found, if not in the protocol                                      |       |
| 54 |                        |                      |                                                                       |       |
| 55 |                        |                      |                                                                       |       |
| 56 | Statistics: additional | <a href="#">#20b</a> | Methods for any additional analyses (eg, subgroup and adjusted        | 11    |
| 57 | analyses               |                      | analyses)                                                             |       |
| 58 |                        |                      |                                                                       |       |
| 59 |                        |                      |                                                                       |       |
| 60 |                        |                      |                                                                       |       |

|    |                            |                      |                                                                         |       |
|----|----------------------------|----------------------|-------------------------------------------------------------------------|-------|
| 1  | Statistics: analysis       | <a href="#">#20c</a> | Definition of analysis population relating to protocol non-             | 10-11 |
| 2  | population and missing     |                      | adherence (eg, as randomised analysis), and any statistical methods     |       |
| 3  | data                       |                      | to handle missing data (eg, multiple imputation)                        |       |
| 4  |                            |                      |                                                                         |       |
| 5  |                            |                      |                                                                         |       |
| 6  | <b>Methods: Monitoring</b> |                      |                                                                         |       |
| 7  |                            |                      |                                                                         |       |
| 8  | Data monitoring:           | <a href="#">#21a</a> | Composition of data monitoring committee (DMC); summary of its          | 12    |
| 9  | formal committee           |                      | role and reporting structure; statement of whether it is independent    |       |
| 10 |                            |                      | from the sponsor and competing interests; and reference to where        |       |
| 11 |                            |                      | further details about its charter can be found, if not in the protocol. |       |
| 12 |                            |                      | Alternatively, an explanation of why a DMC is not needed                |       |
| 13 |                            |                      |                                                                         |       |
| 14 |                            |                      |                                                                         |       |
| 15 |                            |                      |                                                                         |       |
| 16 |                            |                      |                                                                         |       |
| 17 | Data monitoring:           | <a href="#">#21b</a> | Description of any interim analyses and stopping guidelines,            | 11    |
| 18 | interim analysis           |                      | including who will have access to these interim results and make        |       |
| 19 |                            |                      | the final decision to terminate the trial                               |       |
| 20 |                            |                      |                                                                         |       |
| 21 |                            |                      |                                                                         |       |
| 22 | Harms                      | <a href="#">#22</a>  | Plans for collecting, assessing, reporting, and managing solicited      | 10-12 |
| 23 |                            |                      | and spontaneously reported adverse events and other unintended          |       |
| 24 |                            |                      | effects of trial interventions or trial conduct                         |       |
| 25 |                            |                      |                                                                         |       |
| 26 |                            |                      |                                                                         |       |
| 27 | Auditing                   | <a href="#">#23</a>  | Frequency and procedures for auditing trial conduct, if any, and        | 12    |
| 28 |                            |                      | whether the process will be independent from investigators and the      |       |
| 29 |                            |                      | sponsor                                                                 |       |
| 30 |                            |                      |                                                                         |       |
| 31 |                            |                      |                                                                         |       |
| 32 |                            |                      |                                                                         |       |
| 33 | <b>Ethics and</b>          |                      |                                                                         |       |
| 34 | <b>dissemination</b>       |                      |                                                                         |       |
| 35 |                            |                      |                                                                         |       |
| 36 |                            |                      |                                                                         |       |
| 37 | Research ethics            | <a href="#">#24</a>  | Plans for seeking research ethics committee / institutional review      | 12    |
| 38 | approval                   |                      | board (REC / IRB) approval                                              |       |
| 39 |                            |                      |                                                                         |       |
| 40 |                            |                      |                                                                         |       |
| 41 | Protocol amendments        | <a href="#">#25</a>  | Plans for communicating important protocol modifications (eg,           | 12    |
| 42 |                            |                      | changes to eligibility criteria, outcomes, analyses) to relevant        |       |
| 43 |                            |                      | parties (eg, investigators, REC / IRBs, trial participants, trial       |       |
| 44 |                            |                      | registries, journals, regulators)                                       |       |
| 45 |                            |                      |                                                                         |       |
| 46 |                            |                      |                                                                         |       |
| 47 | Consent or assent          | <a href="#">#26a</a> | Who will obtain informed consent or assent from potential trial         | 6     |
| 48 |                            |                      | participants or authorised surrogates, and how (see Item 32)            |       |
| 49 |                            |                      |                                                                         |       |
| 50 |                            |                      |                                                                         |       |
| 51 | Consent or assent:         | <a href="#">#26b</a> | Additional consent provisions for collection and use of participant     | 10    |
| 52 | ancillary studies          |                      | data and biological specimens in ancillary studies, if applicable       |       |
| 53 |                            |                      |                                                                         |       |
| 54 |                            |                      |                                                                         |       |
| 55 | Confidentiality            | <a href="#">#27</a>  | How personal information about potential and enrolled participants      | 10    |
| 56 |                            |                      | will be collected, shared, and maintained in order to protect           |       |
| 57 |                            |                      | confidentiality before, during, and after the trial                     |       |
| 58 |                            |                      |                                                                         |       |
| 59 |                            |                      |                                                                         |       |
| 60 |                            |                      |                                                                         |       |

|    |                                             |                      |                                                                                                                                                                                                                                                                                     |     |
|----|---------------------------------------------|----------------------|-------------------------------------------------------------------------------------------------------------------------------------------------------------------------------------------------------------------------------------------------------------------------------------|-----|
| 1  | Declaration of interests                    | <a href="#">#28</a>  | Financial and other competing interests for principal investigators for the overall trial and each study site                                                                                                                                                                       | 15  |
| 2  |                                             |                      |                                                                                                                                                                                                                                                                                     |     |
| 3  |                                             |                      |                                                                                                                                                                                                                                                                                     |     |
| 4  |                                             |                      |                                                                                                                                                                                                                                                                                     |     |
| 5  | Data access                                 | <a href="#">#29</a>  | Statement of who will have access to the final trial dataset, and disclosure of contractual agreements that limit such access for investigators                                                                                                                                     | 10  |
| 6  |                                             |                      |                                                                                                                                                                                                                                                                                     |     |
| 7  |                                             |                      |                                                                                                                                                                                                                                                                                     |     |
| 8  |                                             |                      |                                                                                                                                                                                                                                                                                     |     |
| 9  |                                             |                      |                                                                                                                                                                                                                                                                                     |     |
| 10 | Ancillary and post trial care               | <a href="#">#30</a>  | Provisions, if any, for ancillary and post-trial care, and for compensation to those who suffer harm from trial participation                                                                                                                                                       | 12  |
| 11 |                                             |                      |                                                                                                                                                                                                                                                                                     |     |
| 12 |                                             |                      |                                                                                                                                                                                                                                                                                     |     |
| 13 |                                             |                      |                                                                                                                                                                                                                                                                                     |     |
| 14 | Dissemination policy: trial results         | <a href="#">#31a</a> | Plans for investigators and sponsor to communicate trial results to participants, healthcare professionals, the public, and other relevant groups (eg, via publication, reporting in results databases, or other data sharing arrangements), including any publication restrictions | 12  |
| 15 |                                             |                      |                                                                                                                                                                                                                                                                                     |     |
| 16 |                                             |                      |                                                                                                                                                                                                                                                                                     |     |
| 17 |                                             |                      |                                                                                                                                                                                                                                                                                     |     |
| 18 |                                             |                      |                                                                                                                                                                                                                                                                                     |     |
| 19 |                                             |                      |                                                                                                                                                                                                                                                                                     |     |
| 20 |                                             |                      |                                                                                                                                                                                                                                                                                     |     |
| 21 | Dissemination policy: authorship            | <a href="#">#31b</a> | Authorship eligibility guidelines and any intended use of professional writers                                                                                                                                                                                                      | 14  |
| 22 |                                             |                      |                                                                                                                                                                                                                                                                                     |     |
| 23 |                                             |                      |                                                                                                                                                                                                                                                                                     |     |
| 24 |                                             |                      |                                                                                                                                                                                                                                                                                     |     |
| 25 | Dissemination policy: reproducible research | <a href="#">#31c</a> | Plans, if any, for granting public access to the full protocol, participant-level dataset, and statistical code                                                                                                                                                                     | 15  |
| 26 |                                             |                      |                                                                                                                                                                                                                                                                                     |     |
| 27 |                                             |                      |                                                                                                                                                                                                                                                                                     |     |
| 28 |                                             |                      |                                                                                                                                                                                                                                                                                     |     |
| 29 | <b>Appendices</b>                           |                      |                                                                                                                                                                                                                                                                                     |     |
| 30 |                                             |                      |                                                                                                                                                                                                                                                                                     |     |
| 31 | Informed consent materials                  | <a href="#">#32</a>  | Model consent form and other related documentation given to participants and authorised surrogates                                                                                                                                                                                  | n/a |
| 32 |                                             |                      |                                                                                                                                                                                                                                                                                     |     |
| 33 |                                             |                      |                                                                                                                                                                                                                                                                                     |     |
| 34 |                                             |                      |                                                                                                                                                                                                                                                                                     |     |
| 35 | Biological specimens                        | <a href="#">#33</a>  | Plans for collection, laboratory evaluation, and storage of biological specimens for genetic or molecular analysis in the current trial and for future use in ancillary studies, if applicable                                                                                      | 9   |
| 36 |                                             |                      |                                                                                                                                                                                                                                                                                     |     |
| 37 |                                             |                      |                                                                                                                                                                                                                                                                                     |     |
| 38 |                                             |                      |                                                                                                                                                                                                                                                                                     |     |
| 39 |                                             |                      |                                                                                                                                                                                                                                                                                     |     |

#### Notes:

- 13: 9-10, Figure 1 The SPIRIT Explanation and Elaboration paper is distributed under the terms of the Creative Commons Attribution License CC-BY-NC. This checklist was completed on 07. April 2021 using <https://www.goodreports.org/>, a tool made by the [EQUATOR Network](#) in collaboration with [Penelope.ai](#)

# BMJ Open

## Acupuncture for Acute Musculoskeletal Pain Management in the Emergency Department and Continuity Clinic: A Protocol for an Adaptive Pragmatic Randomized Controlled Trial

|                                 |                                                                                                                                                                                                                                                                                                                                                                                                                                                                                                                                                                                                                                                                                                                                                                                                                                                                                                                                                                                                                                                                                                                                                                                                                                                                                                                                                                                                                                                                                                                 |
|---------------------------------|-----------------------------------------------------------------------------------------------------------------------------------------------------------------------------------------------------------------------------------------------------------------------------------------------------------------------------------------------------------------------------------------------------------------------------------------------------------------------------------------------------------------------------------------------------------------------------------------------------------------------------------------------------------------------------------------------------------------------------------------------------------------------------------------------------------------------------------------------------------------------------------------------------------------------------------------------------------------------------------------------------------------------------------------------------------------------------------------------------------------------------------------------------------------------------------------------------------------------------------------------------------------------------------------------------------------------------------------------------------------------------------------------------------------------------------------------------------------------------------------------------------------|
| Journal:                        | <i>BMJ Open</i>                                                                                                                                                                                                                                                                                                                                                                                                                                                                                                                                                                                                                                                                                                                                                                                                                                                                                                                                                                                                                                                                                                                                                                                                                                                                                                                                                                                                                                                                                                 |
| Manuscript ID                   | bmjopen-2022-061661.R1                                                                                                                                                                                                                                                                                                                                                                                                                                                                                                                                                                                                                                                                                                                                                                                                                                                                                                                                                                                                                                                                                                                                                                                                                                                                                                                                                                                                                                                                                          |
| Article Type:                   | Protocol                                                                                                                                                                                                                                                                                                                                                                                                                                                                                                                                                                                                                                                                                                                                                                                                                                                                                                                                                                                                                                                                                                                                                                                                                                                                                                                                                                                                                                                                                                        |
| Date Submitted by the Author:   | 28-Jul-2022                                                                                                                                                                                                                                                                                                                                                                                                                                                                                                                                                                                                                                                                                                                                                                                                                                                                                                                                                                                                                                                                                                                                                                                                                                                                                                                                                                                                                                                                                                     |
| Complete List of Authors:       | Eucker, Stephanie; Duke University School of Medicine, Department of Emergency Medicine; Duke University School of Medicine, Department of Orthopaedic Surgery<br>Glass, Oliver; Duke University School of Medicine, Department of Medicine, Division of General Internal Medicine<br>Staton, Catherine; Duke University School of Medicine, Department of Emergency Medicine; Duke Global Health Institute<br>Knisely, Mitchell R.; Duke University School of Nursing<br>O'Regan, Amy; Duke University, Department of Population Health Sciences<br>De Larco, Christi; Duke University School of Medicine, Department of Emergency Medicine<br>Mill, Michelle; Duke University School of Medicine, Department of Emergency Medicine<br>Dixon, Austin; Duke University School of Medicine, Department of Emergency Medicine<br>TumSuden, Olivia; UNC Adams School of Dentistry<br>Walker, Erica; Duke University School of Medicine, Department of Emergency Medicine<br>Dalton, Juliet C.; Duke University, Duke Office of Clinical Research<br>Limkakeng, Alexander; Duke University School of Medicine, Department of Emergency Medicine<br>Maxwell, Ann Miller; Durham Veterans Affairs Health Care System<br>Gordee, Alex; Duke University, Department of Biostatistics and Bioinformatics<br>Kuchibhatla, Maggie; Duke University, Department of Biostatistics and Bioinformatics; Duke University, Center for Aging<br>Chow, Sheinchung; Duke University, Department of Biostatistics and Bioinformatics |
| <b>Primary Subject Heading</b>: | Complementary medicine                                                                                                                                                                                                                                                                                                                                                                                                                                                                                                                                                                                                                                                                                                                                                                                                                                                                                                                                                                                                                                                                                                                                                                                                                                                                                                                                                                                                                                                                                          |
| Secondary Subject Heading:      | Emergency medicine                                                                                                                                                                                                                                                                                                                                                                                                                                                                                                                                                                                                                                                                                                                                                                                                                                                                                                                                                                                                                                                                                                                                                                                                                                                                                                                                                                                                                                                                                              |
| Keywords:                       | Pain management < ANAESTHETICS, ACCIDENT & EMERGENCY MEDICINE, COMPLEMENTARY MEDICINE                                                                                                                                                                                                                                                                                                                                                                                                                                                                                                                                                                                                                                                                                                                                                                                                                                                                                                                                                                                                                                                                                                                                                                                                                                                                                                                                                                                                                           |
|                                 |                                                                                                                                                                                                                                                                                                                                                                                                                                                                                                                                                                                                                                                                                                                                                                                                                                                                                                                                                                                                                                                                                                                                                                                                                                                                                                                                                                                                                                                                                                                 |

1  
2  
3  
4  
5  
6  
7  
8  
9  
10  
11  
12  
13  
14  
15  
16  
17  
18  
19  
20  
21  
22  
23  
24  
25  
26  
27  
28  
29  
30  
31  
32  
33  
34  
35  
36  
37  
38  
39  
40  
41  
42  
43  
44  
45  
46  
47  
48  
49  
50  
51  
52  
53  
54  
55  
56  
57  
58  
59  
60

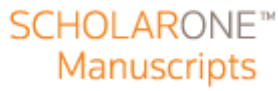

## Title Page

Acupuncture for Acute Musculoskeletal Pain Management in the Emergency Department and Continuity Clinic: A Protocol for an Adaptive Pragmatic Randomized Controlled Trial

## Authors

Stephanie A. Eucker, MD, PhD<sup>1,2,\*</sup>, [stephanie.eucker@duke.edu](mailto:stephanie.eucker@duke.edu)

Oliver Glass, PhD<sup>3</sup>, [oliver.glass@duke.edu](mailto:oliver.glass@duke.edu)

Catherine A. Staton, MD, MSc<sup>1,4</sup>, [catherine.staton@duke.edu](mailto:catherine.staton@duke.edu)

Mitchell R. Knisely, PhD, RN<sup>5</sup>, [mitchell.knisely@duke.edu](mailto:mitchell.knisely@duke.edu)

Amy O'Regan, MPH<sup>6</sup>, [amy.oregan@duke.edu](mailto:amy.oregan@duke.edu), orchid ID: <https://orcid.org/0000-0001-6788-5673>

Christi De Larco, L.Ac., DACM, [christi@acupunctureindurham.com](mailto:christi@acupunctureindurham.com)

Michelle Mill, RN, LAc, [mailofmill@gmail.com](mailto:mailofmill@gmail.com)

Austin Dixon, DACM, L.Ac., Dipl.OM., [austin@austindixonacupuncture.com](mailto:austin@austindixonacupuncture.com)

Olivia TumSuden, BS<sup>1</sup>, [oliviatusuden@gmail.com](mailto:oliviatusuden@gmail.com)

Erica Walker BS, MHA<sup>1</sup>, [erica.walker@duke.edu](mailto:erica.walker@duke.edu)

Juliet C. Dalton, MSc<sup>1</sup>, [juliet.dalton@duke.edu](mailto:juliet.dalton@duke.edu)

Alexander T. Limkakeng, Jr., MD, MHSc, FACEP<sup>1</sup>, [alexander.limkakeng@duke.edu](mailto:alexander.limkakeng@duke.edu)

Ann Miller W. Maxwell, MD<sup>7</sup>, [ann.maxwell@va.gov](mailto:ann.maxwell@va.gov)

Alex Gordee, MA<sup>8,9</sup>, [alexander.gordee@duke.edu](mailto:alexander.gordee@duke.edu)

Maggie Kuchibhatla, PhD<sup>8,10</sup>, [maggiek@dm.duke.edu](mailto:maggiek@dm.duke.edu)

Shein-Chung Chow, PhD<sup>8</sup>, [sheinchung.chow@duke.edu](mailto:sheinchung.chow@duke.edu)

## Author affiliations

<sup>1</sup>Duke University, Department of Emergency Medicine

<sup>2</sup>Duke University, Department of Orthopedics

<sup>3</sup>Duke University, Department of Medicine, Division of General Internal Medicine

<sup>4</sup>Duke University, Duke Global Health Institute

<sup>5</sup>Duke University School of Nursing

<sup>6</sup>Duke University, Department of Population Health Sciences

<sup>7</sup>Durham Veterans Affairs Health Care System

<sup>8</sup>Duke University, Department of Biostatistics and Bioinformatics

<sup>9</sup>Duke University Biostatistics, Epidemiology, and Research Design Methods Core

<sup>10</sup>Duke University Center for Aging

\*Corresponding author:

Stephanie A. Eucker

[stephanie.eucker@duke.edu](mailto:stephanie.eucker@duke.edu)

Duke University Hospital

2301 Erwin Rd

DUMC 3096

Durham, NC 27710

919-681-0196



1  
2  
3  
4  
5  
6  
7  
8  
9  
10  
11  
12  
13  
14  
15  
16  
17  
18  
19  
20  
21  
22  
23  
24  
25  
26  
27  
28  
29  
30  
31  
32  
33  
34  
35  
36  
37  
38  
39  
40  
41  
42  
43  
44  
45  
46  
47  
48  
49  
50  
51  
52  
53  
54  
55  
56  
57  
58  
59  
60

**Key words:**

- Acupuncture therapy
- Pain management
- Emergency medicine
- Emergency service, hospital
- Musculoskeletal pain

**Word count:** 4638 words

For peer review only

## Abstract

**Introduction:** Chronic musculoskeletal pain causes a significant burden on health and quality of life and may result from inadequate treatment of acute musculoskeletal pain. The Emergency Department (ED) represents a novel setting in which to test nonpharmacologic interventions early in the pain trajectory to prevent the transition from acute to chronic pain. Acupuncture is increasingly recognized as a safe, affordable and effective treatment for pain and anxiety in the clinic setting, but it has yet to be established as a primary treatment option in the ED.

**Methods and analysis:** This pragmatic clinical trial uses a two-stage adaptive randomized design to determine the feasibility, acceptability, and effectiveness of acupuncture initiated in the ED and continued in outpatient clinic for treating acute musculoskeletal pain. The objective of the first (treatment selection) stage is to determine the more effective style of ED-based acupuncture, auricular acupuncture or peripheral acupuncture, as compared to no acupuncture. All arms will receive usual care at the discretion of the ED provider blinded to treatment arm. The objective of the second (effectiveness confirmation) stage is to confirm the impact of the selected acupuncture arm on pain reduction. An interim analysis is planned at the end of Stage 1 based on probability of being the best treatment, after which adaptations will be considered including dropping the less effective arm, sample size re-estimation, and unequal treatment allocation ratio (e.g., 1:2) for Stage 2. Acupuncture treatments will be delivered by licensed acupuncturists in the ED and twice weekly for 1 month afterward in an outpatient clinic.

**Ethics and dissemination:** This study has been reviewed and approved by the Duke University Health System Institutional Review Board. Informed consent will be obtained from all participants. Results will be disseminated through peer review publications and public and conference presentations.

**Trial registration number:** ClinicalTrials.gov: NCT04290741

## Article Summary

### Strengths and limitations of this study

- Two-stage adaptive design balances improved implementation with statistical power to measure effectiveness of acupuncture.
- Two types of acupuncture, (battlefield) auricular and peripheral, enable efficient emergency department treatment and are compared to control.
- Pragmatic design better replicates real-world conditions but limits assessment of specific vs non-specific effects of acupuncture on pain outcomes.
- Includes longitudinal delivery of acupuncture treatments in both the emergency department and outpatient clinic for one month to treat acute musculoskeletal pain.
- Breadth of biopsychosocial outcomes to assess how acupuncture works and help bridge the gap between eastern and western medicine.

## Introduction

Over 40 million adults in the United States (US) suffer from chronic pain, which is pain lasting three months or longer.[1] Musculoskeletal pain, one of the largest subsets of chronic pain conditions, leads to high rates of healthcare utilization, increased opioid use, and poor physical, psychological, and cognitive health.[1] Musculoskeletal pain often results from an acute injury, and if not adequately treated, can transition to a chronic pain condition.[2,3] Significant challenges exist for adequately managing musculoskeletal pain due to the heterogenous nature of its causes and pain symptomatology, and standard treatments are often ineffective.[4,5] Additionally, numerous biological (e.g., inflammatory mediators), psychological (e.g., pain catastrophizing), and social (e.g., social support) factors (referred to collectively as “biopsychosocial” factors) contribute to the complexity of musculoskeletal pain development, severity, progression and disability.[6] Recent studies have begun to explore the role of biopsychosocial factors in the transition from acute to chronic pain and how they may serve as targets for intervention.[3,7] One strategy to prevent the transition from acute to chronic pain is early intervention using nonpharmacologic strategies that influence these biopsychosocial factors. The Emergency Department (ED) represents a novel setting in which to test nonpharmacologic interventions early in the pain trajectory with the goal of preventing the transition from acute to chronic musculoskeletal pain.

Acupuncture is a safe and cost-effective treatment for acute and chronic pain, particularly of the back, neck, and shoulder.[8,9] Furthermore, acupuncture has shown benefit in treating both pain and anxiety,[8] and acts on numerous neural, endogenous opioid and inflammatory pathways,[10] thereby representing a broader biopsychosocial intervention than other single pain treatment modalities. However, data on the use of acupuncture for pain management in the ED is limited since acupuncture practitioners are not currently standard or commonplace in US EDs.[11,12] A recent meta-analysis of ED studies has shown acupuncture to be superior to sham/placebo and equivalent or better than medications for pain reduction.[11,13] Only three small pilot studies have compared acupuncture combined with usual care to usual care alone, with results favoring acupuncture.[11,14] No study has compared different acupuncture protocols (e.g., battlefield/auricular acupuncture and peripheral acupuncture) to determine which is more efficacious, feasible or acceptable in the ED. Moreover, despite evidence that acupuncture is more effective with multiple sessions,[15] prior ED studies have not included a longitudinal outpatient acupuncture component for post-ED pain management or longer-term outcomes.

Therefore, the purpose of this study is to determine the effectiveness, feasibility and acceptability of acupuncture initiated in the Emergency Department (ED) and continued in a group clinic setting for treating acute musculoskeletal pain. The ED population is largely heterogeneous in sociodemographic composition and comprises populations previously excluded from acupuncture studies.[16] A **pragmatic randomized controlled trial** can determine the extent to which ED patients will attend and derive benefit from the full acupuncture experience, while extending the scope and assessment of treatment effectiveness to a more broadly representative U.S. patient population. We hypothesize that, when added to usual care, acupuncture initiated in the ED and continued in an outpatient setting for one month is more effective than usual care alone at reducing acute musculoskeletal pain at 1 hour while in the ED and at 1 month after ED visit.

## **METHODS AND ANALYSIS:**

### **Study design**

This pragmatic clinical trial uses a two-stage adaptive randomized design to determine the feasibility, acceptability, and effectiveness of acupuncture initiated in the Emergency Department (ED) for treating acute musculoskeletal pain. The objective of the first (treatment selection) stage is to determine the more effective style of ED-based acupuncture, i.e., Auricular Acupuncture (AA) based on the Battlefield Acupuncture protocol, or Peripheral Acupuncture (PA), as compared to no acupuncture (NA). The objective of the second (effectiveness confirmation) stage is to confirm the impact of the selected acupuncture arm on pain reduction. An interim analysis is planned at the end of Stage 1 based on probability of being the best treatment,[17] after which adaptations will be considered including dropping the less effective arm, sample size re-estimation, and unequal treatment allocation ratio such as 1:2 ratio for effectiveness in Stage 2. Acupuncture treatments will be delivered by licensed acupuncturists in the ED and up to 2 times per week for 1 month afterward in an outpatient clinic. In this pragmatic design, all study arms will receive usual care for pain management at the discretion of the ED provider who will be blinded to treatment arm.

### **Study setting and recruitment**

Trial participants will be recruited from the Duke University Hospital Emergency Department (ED), an urban academic tertiary care referral center in North Carolina with 80,000 ED visits per year. All study screening, recruitment, informed e-consent (Appendix 1), and enrollment procedures will be performed by trained clinical research coordinators. Study acupuncturists will be available during enrollment to explain acupuncture treatment to eligible patients. Outpatient acupuncture visits will be scheduled with the study acupuncturists using secure HIPAA-compliant scheduling software and take place at the Duke Integrative Medicine Clinic. Patient recruitment began in February 2020 and is ongoing. The study start date is February 10, 2020, and planned end date is February 28, 2023.

### **Eligibility Criteria**

#### **Inclusion criteria**

Participants must be adult (age 18 years or older) ED patients with pain in the neck, back, arms and/or legs and a clinical diagnosis of acute ( $\leq 7$  days) musculoskeletal pain as determined by an ED provider, and able to read and understand the consent form in English. Participants with acute exacerbation of chronic pain in which the acute component is  $\leq 7$  days will be included, as this is a common ED presentation.[18]

#### **Exclusion criteria**

Patients will be excluded if they are: (1) suspected to have a non-musculoskeletal cause of pain, (2) unable to receive acupuncture due to injury, infection, or other contraindication to the use of needles at acupuncture sites; (3) not possible to attend outpatient clinic (e.g., visiting from out-of-state); (4) unable to provide informed consent or to comprehend or complete study measures or procedures due to cognitive impairment, including evidence of drug, medication or alcohol intoxication, or due to severe hearing or speech impairment; (5) unable to safely participate due

1  
2  
3 to critical illness, obvious bony deformity, other serious medical condition (including active  
4 COVID-19 infection), and/or based on ED provider judgment.  
5

### 6 7 **Randomization and Blinding**

8 Subjects will be randomized 1:1:1 to one of three treatment groups: 1) auricular acupuncture  
9 (AA), 2) peripheral acupuncture (PA), or 3) the control group with no acupuncture (NA). The  
10 randomization code will be computer-generated by the Biostatistics, Epidemiology and  
11 Research Design (BERD) Methods Core of the Department of Biostatistics and Bioinformatics,  
12 Duke University Medical Center. An unstratified block randomization method will be used to  
13 generate the random allocation sequence, which will be stored in a secure electronic file  
14 accessible only by the acupuncturists to ensure allocation concealment. The research  
15 coordinator enrolling eligible patients will be blinded to the allocation sequence and  
16 randomization assignments. After participant baseline measures and acupuncturist initial clinical  
17 assessment, the treating acupuncturist will open the randomization file and assign the  
18 participant to the treatment group corresponding to the next sequential entry.  
19

20  
21 The participants and the acupuncturists will not be blinded to their treatment allocation. All  
22 other members of the ED clinical and research teams will be blinded. Round stickers will be  
23 applied to the ears of all participants at the battlefield protocol sites to blind these members to  
24 patient assignment while in the ED. If the participant reports an adverse event, the research  
25 coordinator may become unblinded to record and address the event. Due to the adaptive nature  
26 of the statistical design, the statisticians and data safety monitoring committee (DSMC) will be  
27 unblinded to the control treatment arm in Stage 1 to perform the interim analysis; the statistician  
28 analyzing the data will remain blinded to the treatment arms. All other study investigators will  
29 remain blinded.  
30  
31

### 32 33 **Interventions**

34 Acupuncture will only be performed by licensed acupuncturists. For this study, two styles of  
35 acupuncture designed to increase feasibility in the ED will be employed. (1) Auricular  
36 acupuncture (AA) will involve the placement of pyonex needles in up to 5 sites on each ear  
37 based on the previously developed battlefield acupuncture protocol to treat pain.[19,20] (2)  
38 Peripheral acupuncture (PA) will involve the placement of needles in head, neck, arms, legs,  
39 hands, and feet sites selected at the clinical discretion of the treating acupuncturist based upon  
40 acupuncture diagnosis as the primary mode of therapy.[21,22] Acupuncture sites on the torso  
41 (i.e., chest, back and abdomen) will not be used, as accessing these sites is often logistically  
42 challenging in a busy ED environment. Both acupuncture groups will receive acupuncture while  
43 in the ED. Afterwards, both groups will receive information and free access to acupuncture in an  
44 outpatient clinic for up to 2 times a week for 1 month after their ED visit. Our outpatient  
45 acupuncture clinic is designed as a group-based clinic modified for COVID-19-related social  
46 distancing to enhance access and affordability. All post-ED outpatient acupuncture treatments  
47 for both acupuncture groups will involve either PA, AA or both at the clinical discretion of the  
48 treating acupuncturist. The specific components of each acupuncture treatment will be recorded  
49 in details according to the revised Standards for Reporting Interventions in Clinical Trials of  
50 Acupuncture (STRICTA) recommendations.[23] (3) The control group (no acupuncture = NA)  
51 will not receive acupuncture in the ED and will be asked not to seek acupuncture treatment for  
52  
53  
54  
55  
56  
57  
58  
59

one month after their ED visit. Control group participants will complete assessments only, with the timing and content of their assessments matching those completed by the intervention groups.

All participants in the control group and in both acupuncture groups will receive usual care for acute pain management at the discretion of their ED provider who will remain blinded to study arm. Usual care may include but is not limited to medications/analgesics, nonpharmacologic strategies (e.g., ice, heat, walking), and referrals to outpatient specialists and/or other nonpharmacologic treatment providers (e.g., physical therapy).

### Outcomes

Outcome measures and biopsychosocial factors will be collected before randomization (ED baseline), 1 hour after randomization, and at 2 weeks and 1 month post-ED visit.

### Primary Outcome Measures

The primary ED effectiveness endpoint will be the change in current pain score based on the 0-10 pain numeric rating scale (NRS) from ED baseline to 1 hour post-treatment. The primary combined ED-outpatient clinic effectiveness endpoint will be change in 24-hour average NRS pain score from ED baseline to 1 month post-ED visit.

Feasibility will be assessed based on patient recruitment and retention rates both in the ED and with subsequent one-month follow-up. Acceptability will be assessed based on patient-reported satisfaction as well as outpatient acupuncture clinic attendance rates, with attention to reasons for attrition or differential acceptance rates for different groups of participants. Safety will be evaluated by recording any adverse events (AEs), with common reasons to include bleeding, bruising, or pain at the needle sites. Serious adverse events (SAEs) are expected to be extremely rare given previous highly favorable safety data on acupuncture, and include infections, hospitalizations and deaths.[21,24]

### Secondary Outcome Measures

Secondary outcomes will include patient function, quality of life, and biopsychosocial factors.

Function and quality-of-life will be measured at ED baseline, 2 weeks and 1 month across several different domains, including pain interference, fatigue, depression, anxiety, sleep disturbance, physical function, social function, and cognitive function, using the validated PROMIS-29 and Neuro-QoL instruments.[25,26] Given the acute time course of pain (7 days or less) for eligible participants, the timeframe for the PROMIS-29 questions will be modified from “over the past 7 days” to “over the past 24 hours (1 day)” for the ED baseline assessment only. We will also measure patient-reported medication use, including opioid and non-opioid medications. Opioid use will be assessed through patient report in the past 24 hours and in the past 7 days, as well as by electronic medical record (EMR) data extraction of prescriptions written during and up to one year after the ED visit.

A comprehensive set of biopsychosocial factors will be measured at ED baseline and one-month follow-up. These include:

(1) Patient demographics including age, sex, race, ethnicity, employment, marital status, education, income, and insurance status.



- 1
- 2
- 3 (2) Pain characteristics including anatomical location of pain, duration of current episode of
- 4 musculoskeletal pain, and history of prior episodes of musculoskeletal pain.
- 5 (3) Degree and type of social support, including instrumental, informational, and emotional
- 6 support, will be measured using the PROMIS Social Support 4-item scales.[27]
- 7 (4) All non-medical substance use, including opioid misuse, through the validated ASSIST
- 8 tool.[28]
- 9 (5) Presence and severity of chronic pain using a recently validated simplified version of the
- 10 graded chronic pain scale derived from the 3-item pain, enjoyment and general activity (PEG)
- 11 score and degree of activity limitations.[29,30]
- 12 (6) Symptoms of systemic pathology will be measured using the validated Optimal Screening for
- 13 Prediction of Referral and Outcome Review of Systems (OSPRO-ROS) tool, which predicts pain
- 14 outcomes after musculoskeletal care in outpatient physical therapy settings.[31,32]
- 15 (7) Pain-related psychological distress using the validated concise Optimal Screening for
- 16 Prediction of Referral and Outcome Yellow Flag (OSPRO-YF) tool, an assessment tool for
- 17 measuring psychological response to pain including pain coping, catastrophizing, fear-
- 18 avoidance and mood [32,33].
- 19 (8) Pain-related emotional distress based on the Perceived Stress Scale (PSS) tool.[34]
- 20 (7) Pain coping skills using the Coping Skills Questionnaire 2-item form (CSQ-2).[35]
- 21 (8) Pain self-efficacy using the Pain Self-Efficacy Questionnaire (PSEQ).[36]
- 22
- 23
- 24
- 25
- 26

27 Two additional measures will be collected in-person in the ED at baseline and 1 hour:

- 28 (9) Pressure pain threshold, a non-invasive quantitative test of pain sensitivity that measures the
- 29 lowest applied pressure needed to evoke to an individual's perception of pain, will be performed
- 30 on the bilateral trapezius muscles using slow progressive pressure (1 kg/cm<sup>2</sup>/sec) with a
- 31 standard hand-held algometer (Wagner Digital Force Gauge, Wagner Instruments, Greenwich,
- 32 CT).[37,38]
- 33 (10) Blood samples will be collected and stored in a secure repository for future biomarker
- 34 analysis of biochemical and genetic pathways involved in pain and response to acupuncture.
- 35 Participants may opt out of the blood draw and still participate in the clinical trial.
- 36
- 37
- 38

39 Additional EMR data will be extracted by trained analysts and include medications administered

40 and prescribed from the ED, opioids prescribed up to one year following index ED visit, return

41 ED visits and hospitalizations up to 3 months following index ED visit, and ICD-10 codes for

42 pain conditions and co-occurring diagnoses (e.g., medical and psychiatric comorbidities).

43

44

45

### 46 **Data Collection and Management**

47 Data will be collected at ED baseline, 1 hour post-treatment, and at 2 weeks and 1 month post-

48 ED visit, with data entered directly into a REDCap secure electronic database.[39] All in-person

49 biological measures including pressure pain threshold and blood draws for biomarkers will be

50 obtained during the ED visit at baseline and 1 hour by research coordinators embedded in the

51 ED. Pressure pain threshold will be recorded in REDCap. Blood samples will be coded with a

52 unique study identifier and deidentified for storage.

53

54 ED baseline and 1-hour questionnaires to collect biopsychosocial factors and outcome

55 measures will be completed by participants independently and entered directly into REDCap

56

57

58

59

60

while they are in the ED (**Figure 1**). Research coordinators will be available for assistance with data entry if requested by participants. Participants will be contacted at 2 weeks and 1 month post-ED visit to complete online REDCap follow-up surveys (**Figure 1**) using follow-up procedures to facilitate maximum study retention. These procedures include up to three automated electronic follow-up surveys sent via email, automated text message links to the surveys, follow-up phone calls by ED research assistants with the option to complete surveys by phone, and compensation for one-month follow-up assessment completion.

Acupuncturist assessments and treatment details in the ED and outpatient clinic will be entered directly into REDCap forms by the treating acupuncturist. ED medication data will be entered into REDCap forms by research coordinators. Acupuncture AEs and SAEs will be entered into REDCap forms by the study personnel notified of the event, and follow-up of the events will be completed within the same forms by the personnel completing follow-ups. Additional EMR data will be extracted by trained analysts and stored in a protected analytics environment. All data will be stored for at least 5 years after study completion for primary and ancillary studies, with access restricted to study staff, and is included in patient consent. To protect confidentiality, no personal information will be shared.

### Sample size

For Stage 1, a total of 90 subjects (30 subjects per arm) will be used to (i) assess feasibility based on patient recruitment and retention rates, and (ii) determine the more effective arm at the ED one-hour timepoint for moving forward to Stage 2 for effectiveness confirmation. Sample size calculation for achieving Stage 2 study objectives assumed<sup>[17,40,41]</sup>: (1) a Stage 2 two-arm parallel design with 1:2 control:treatment allocation; (2) the primary endpoint is normally distributed; (3) with no acupuncture, a mean pain score of 6.5 with a standard deviation of 2.5;<sup>[42]</sup> (4) a minimally clinically meaningful difference in pain score of 1.3;<sup>[42]</sup> (5) a power of 90.0%; and (6) a 5% level of significance. This yielded a total sample size of 198 subjects (**Table 1**) at the end of Stage 2. To account for a possible 10% dropout rate requires increasing the total number enrolled to 220 subjects.

**Table 1. Sample Size Estimation and Allocation**

| Stage   | Randomization | Sample Size               | Total |
|---------|---------------|---------------------------|-------|
| Stage 1 | 1:1:1         | 30 (NA), 30 (AA), 30 (PA) | 90    |
| Stage 2 | 1:2           | 36 (NA), 72 (AA or PA)    | 108   |
|         |               | Total                     | 198   |

### Data Analysis and Statistical Methods

**Population:** The primary analysis will be performed based on the intention-to-treat (ITT) population, which is defined as all randomized subjects who have at least one follow-up evaluation regardless of their compliance with the protocol. In case of a substantial number of protocol violations, additional per-protocol analyses may be performed to determine whether they influence the conclusions.

**General Analysis Conventions/Rules:** Descriptive statistics for continuous variables will be provided as: number of subjects, means and standard deviations, medians and interquartile

1  
2  
3 ranges, and minima and maxima. Descriptive statistics for discrete (categorical) variables will be  
4 provided as the number and percentage of subjects in each category. Time to event variables  
5 will be provided using Kaplan-Meier survival curve estimates. Unless otherwise noted, any tests  
6 of hypotheses are two-sided, and the nominal level of significance will be 5%.  
7

8  
9 Handling of Missing Data: Imputation of missing data will be handled depending on the  
10 missingness mechanism.  
11

12  
13 Baseline Comparability: Number of subjects randomized, completing the study and reasons for  
14 discontinuation will be summarized by treatment group. Patient demographics and baseline  
15 characteristics including biopsychosocial factors will be tabulated and compared for treatment  
16 group differences. All comparisons will be performed by using the Cochran-Mantel-Haenszel  
17 (CMH) test for categorical variables and two-way analysis of variance for continuous variables.  
18

19  
20 Primary Analysis: The primary variable, change in pain score from ED baseline to 1 hour post-  
21 treatment, will be evaluated and compared between treatment groups. The corresponding 95%  
22 confidence interval for the difference in mean response rate between treatment groups will be  
23 obtained using analysis of variance (ANOVA).  
24

25  
26 Secondary Analyses: Responder analysis will also be performed using a logistic regression  
27 analysis that incorporates potential risk factors identified for response. Point estimate and the  
28 corresponding 95% confidence interval of odds ratios for the identified risk factors will also be  
29 obtained. In addition, the Stuart-Maxwell test may be performed to examine changes (or shifts)  
30 from baseline to follow-ups after ED discharge.  
31

32  
33 Exploratory Analyses: Exploratory analyses such as biomarker changes pre to one-hour post-  
34 treatment, subgroup analyses based on patient demographics and/or patient characteristics,  
35 and predictive model building, validation, and/or generalizability may be conducted as deemed  
36 appropriate by the principal investigator(s), biostatistician or as recommended by an internal  
37 established data safety monitoring committee (DSMC). These include secondary analyses of  
38 the impact on outcomes of the number of acupuncture needle sites or number of acupuncture  
39 pathways used, number of clinic visits attended, within treatment pain and/or anxiety reductions,  
40 among others. If possible, additional exploratory models predicting response to acupuncture  
41 based on biopsychosocial factors will be examined.  
42

43  
44 Safety Analysis: Table will show the AEs ordered by decreasing frequency for all participants.  
45 Separate tabulations will summarize the AEs by seriousness, severity, and possible association  
46 with study drug. If appropriate, the incidence rate of AEs will be compared by Fisher's Exact  
47 Test. Special attention will be given to those subjects who have discontinued due to AEs and  
48 those subjects who experienced a SAE.  
49

50  
51  
52  
53 Interim Analysis: There will be one planned interim analysis which will take place when two-  
54 thirds of subjects (i.e., 20 of 30 subjects per arm) have completed Stage 1. At interim analysis,  
55 the feasibility will be assessed based on patient recruitment and retention rates, and the more  
56  
57  
58

1  
2  
3 effective arm will be determined based on change in pain score at the one-hour ED timepoint  
4 based on probability of being the more effective treatment.[17] Some adaptations such as  
5 modifying current treatment arm, different randomization scheme, additional interim analyses,  
6 and/or sample size re-estimation may be applied as recommended by the DSMC.  
7  
8

### 9 **Data Monitoring**

10 A data safety monitoring committee (DSMC) comprised of an independent biostatistician,  
11 emergency medicine physician-researcher and a medical acupuncturist-pain medicine clinician  
12 will meet at least 2 times per year with ad hoc reports as needed, to monitor the safety and  
13 performance quality of the trial. The DSMC will also evaluate the interim analysis to make  
14 recommendations on adaptations for Stage 2 to the study investigators.  
15

16 AEs and SAEs and their follow ups will be recorded in a secure REDCap file. AEs will be  
17 reviewed weekly, and SAEs will be reviewed immediately by the principal investigator and lead  
18 research coordinator and addressed as needed. All SAEs will be reported within 24 hours to  
19 the DSMC, IRB and study sponsor.  
20  
21

### 22 **Ethics and Dissemination**

23 The Duke University Health System Institutional Review Board has reviewed and approved this  
24 study (Protocol # Pro00104140). This trial was registered on 2/7/2020 with clinicaltrials.gov  
25 (registration # NCT04290741) and released to the public on 2/28/2020. We used the SPIRIT  
26 checklist when writing our report.[43] Upon completion of the trial, the results will be  
27 disseminated through peer review publications as well as presentations at professional  
28 organization conferences and to the public including healthcare organizations.  
29  
30  
31

### 32 **Patient and Public Involvement**

33 Patients and the public were not involved in the original design of the study. However, patient  
34 participants will be interviewed for feedback on their acupuncture and research experience to  
35 potentially inform future adaptations.  
36  
37

### 38 **Discussion**

39 Adaptive design: The innovative adaptive design of this study enables findings from the first  
40 stage to be used to increase the likelihood of success in the second stage for measuring the  
41 true effectiveness of acupuncture in an ED population. Adaptations to drop the least effective  
42 arm and/or mitigate issues that arise in Stage 1 are designed to optimize implementation of  
43 acupuncture for both the study and its broader applicability to other settings.[44] Efforts will be  
44 made to limit potential bias from adaptations and maintain trial integrity and validity by utilizing  
45 an independent DSMC to decide on any adaptations.  
46  
47  
48

49 Novel care pathways: This will be one of the first randomized trials to integrate acupuncture into  
50 ED care and to establish linkages to outpatient acupuncture treatment. It will also be one of the  
51 first acupuncture studies to include a diverse sociodemographic population and to utilize a  
52 group-based clinic to enhance access and affordability of this treatment option.[16] Patient  
53 knowledge of, access to, and availability of nonpharmacologic therapies are frequent barriers to  
54 use.[16,45] Post-ED follow-up can be particularly challenging among ED patients due to cost  
55  
56  
57  
58  
59  
60

1  
2  
3 and time constraints, so lowering these barriers are key to improving access to care.  
4 Furthermore, initial therapeutic experience with acupuncture has been shown to increase  
5 patient follow-through with continued acupuncture,[46] highlighting the benefit of combining ED  
6 with outpatient care. Goals of the study include reducing patient need for pain medications,  
7 particularly opioids, and return ED visits for pain control through use of acupuncture. Our  
8 findings will inform future ED and follow-up acupuncture treatment recommendations.  
9  
10

11 Tailoring Acupuncture to the ED environment: Comparing auricular acupuncture (AA) to  
12 peripheral acupuncture (PA) in the ED setting is a key component of our study, as it allows  
13 further exploration of the feasibility and acceptability of ED-based acupuncture through two  
14 different patient experiences. AA can be delivered quickly, easily, and without removal of  
15 clothing, thus fitting well within the space and time constraints of the ED environment.[19]  
16 Furthermore, specific types of auricular needles can be left in place for later self-stimulation by  
17 patients to provide additional pain relief for an additional 1-5 days.[19,47] Use of AA can be  
18 limited by patient discomfort with needles in the ear, potential compatibility issues with obtaining  
19 CT and MRI imaging while needles are in place, and lack of clinical guidelines for its use.  
20  
21

22 Peripheral acupuncture (PA) allows for greater personalization of treatment than AA by  
23 offering a much larger number of meridians or channels that the acupuncturist can access for  
24 pain relief.[48,49] PA also offers the flexibility to adapt treatments for very anxious or needle-  
25 sensitive patients because needle depth and level of stimulation can be modified to suit  
26 individual needs. While tight clothing may limit the number of accessible acupuncture points,  
27 this is typically not a major barrier for experienced acupuncturists.  
28  
29

30 While PA can take longer for the patient, 20-45 minutes for PA compared with 10-20  
31 minutes for AA, spending more time with the acupuncturist can contribute to their increased  
32 sense of support and better anxiety relief. In addition, PA can be more efficient for the  
33 acupuncturist than AA when treating multiple patients, as the acupuncturist can leave one  
34 patient while needles are in place to tend to the next patient, returning later for needle removal  
35 and session completion. By contrast, AA involves frequent patient reassessments between each  
36 needle insertion requiring the acupuncturist's full attention until session completion before  
37 proceeding to the next patient.  
38  
39  
40

41 Usual care for ED pain management: The choice of usual care for all treatment arms was based  
42 on the goal of developing a practical and feasible intervention in the ED setting where  
43 medications are expected by patients but can be variably prescribed among providers.[50,51]  
44 Therefore, restriction of medications from any one arm could be perceived as undesirable or  
45 unethical by ED patients seeking care. In addition, choice of medication can depend on many  
46 factors, including provider and patient preferences, and allergies, adverse reactions, or  
47 contraindications to specific medications. Therefore, in order to increase the applicability of our  
48 findings, the decision was made to allow provider judgement to dictate medication choice as  
49 well as dosing. This has the added benefit of managing breakthrough pain through usual ED  
50 provider reassessment and repeat dosing as deemed clinically appropriate. ED providers were  
51 kept blinded to treatment arm so that their usual clinical judgement determined usual care  
52 treatment. Thus, the results of this trial will reflect the results expected in actual clinical practice  
53 in an academic ED.  
54  
55  
56  
57  
58  
59  
60



1  
2  
3 The choice of no acupuncture for the control group as compared with sham or other placebo  
4 was based on the goal of studying the effect of acupuncture in a pragmatic setting. Given the  
5 high volume, high throughput environment of most US EDs, there is not a typical usual care  
6 option that would equate to a placebo or sham intervention. For instance, most EDs do not have  
7 the time or resources to routinely provide another nonpharmacologic practitioner or additional  
8 ED staff member who could devote extra time for patient support. Thus, the alternative to  
9 acupuncture in most settings would simply be no acupuncture, with a focus on medication  
10 prescriptions, supportive care, and/or, less commonly, outpatient referrals (e.g., primary care,  
11 physical therapist, orthopedist) for further management.  
12  
13  
14

15 Breadth of Study Outcomes: This study will also generate data on biopsychosocial factors to  
16 better characterize the population of patients seen in the ED for acute musculoskeletal pain.  
17 Exploration of these factors may also identify mediators of the patient response to acupuncture.  
18 These mediators may help identify patients more likely to improve with acupuncture and/or  
19 better elucidate potential mechanisms of acupuncture's therapeutic effects. Findings from this  
20 study will further our understanding of acute pain and its nonpharmacologic management  
21 through acupuncture, as well as their associations with the comprehensive set of  
22 biopsychosocial factors.  
23  
24  
25  
26  
27  
28  
29

### 30 **Acknowledgements**

31 The authors are grateful to Tara Bianca Rado for her input as a licensed acupuncturist on the  
32 design and acupuncture treatment details of this study. We are also grateful to Andrew Bouffler,  
33 Lauren McGowan and Tedra Porter for informing the study design through their experience and  
34 insight as clinical research coordinators.  
35  
36  
37

### 38 **Author contributions**

39 SAE drafted the study protocol manuscript. OG, CAS, and MRK participated in the design of the  
40 study and revising the protocol manuscript. SC, MK and AG were responsible for the statistical  
41 design of the study and revising the protocol manuscript. CDL, MM, AD, AMM and ATL provided  
42 clinical advice and made critical revisions to the protocol and manuscript. EW, AO, OT and JD  
43 were involved as clinical research coordinators in revising and editing the protocol and  
44 manuscript. SAE is principal investigator of the study and is responsible for making final  
45 decisions on the trial design and manuscript preparation. All authors approved the final  
46 manuscript.  
47  
48  
49

50 **Protocol version:** 1.27, Date 02/25/2021  
51

### 52 **Funding**

53  
54  
55  
56  
57  
58  
59  
60

1  
2  
3 This project is supported by The Substance Abuse and Mental Health Services Administration  
4 (SAMHSA) Emergency Department Alternatives to Opioids Demonstration Program (ED-ALT)  
5 Grant number H79TI083109.  
6  
7

8 This project is included as part of the Duke School of Medicine Opioid Collaboratory which is  
9 administered through the Duke Department of Population Health Sciences and supported by  
10 grant funding from the Duke Endowment. The Collaboratory's mission is to save lives and  
11 reduce the harmful impact of opioids in North Carolina through the development,  
12 implementation, and/or evaluation of system-level interventions.  
13  
14

15 The Duke Biostatistics, Epidemiology, and Research Design Core's support was made possible  
16 by the CTSA Grant (UL1TR002553) from the National Center for Advancing Translational  
17 Sciences (NCATS) of the NIH and the NIH Roadmap for Medical Research. This report's  
18 contents are solely the responsibility of the authors and do not represent the official views of  
19 NCATS or NIH.  
20  
21

22 The study funders had no role in the study design, collection or analysis of data.  
23  
24

#### 25 **Competing interests**

26 None declared.  
27

#### 28 **Patient consent**

29 Obtained. See Appendix 1.  
30  
31

#### 32 **Ethics approval**

33 The Duke University Health System Institutional Review Board has reviewed and approved this  
34 study on January 29, 2020 (Protocol No: Pro00104140).  
35  
36

#### 37 **Data availability statement**

38 Not applicable.  
39  
40  
41  
42  
43  
44  
45  
46  
47  
48  
49  
50  
51  
52  
53  
54  
55  
56  
57  
58  
59  
60



## Bibliography

- 1 Pitcher MH, Von Korff M, Bushnell MC, *et al.* Prevalence and Profile of High-Impact Chronic Pain in the United States. *J Pain* 2019;**20**:146–60. doi:10.1016/j.jpain.2018.07.006
- 2 Friedman BW, Conway J, Campbell C, *et al.* Pain One Week After an Emergency Department Visit for Acute Low Back Pain Is Associated With Poor Three-month Outcomes. *Acad Emerg Med* 2018;**25**:1138–45. doi:10.1111/acem.13453
- 3 Stevans JM, Delitto A, Khoja SS, *et al.* Risk factors associated with transition from acute to chronic low back pain in US patients seeking primary care. *JAMA Netw Open* 2021;**4**:e2037371. doi:10.1001/jamanetworkopen.2020.37371
- 4 Chou R, Deyo R, Friedly J, *et al.* Systemic pharmacologic therapies for low back pain: A systematic review for an american college of physicians clinical practice guideline. *Ann Intern Med* 2017;**166**:480–92. doi:10.7326/M16-2458
- 5 Busse JW, Sadeghirad B, Oparin Y, *et al.* Management of Acute Pain From Non-Low Back Musculoskeletal Injuries : A Systematic Review and Network Meta-analysis of Randomized Trials. *Ann Intern Med* Published Online First: 18 August 2020. doi:10.7326/M19-3601
- 6 Edwards RR, Dworkin RH, Sullivan MD, *et al.* The role of psychosocial processes in the development and maintenance of chronic pain. *J Pain* 2016;**17**:T70-92. doi:10.1016/j.jpain.2016.01.001
- 7 Kent ML, Tighe PJ, Belfer I, *et al.* The ACTION-APS-AAPM Pain Taxonomy (AAAPT) Multidimensional Approach to Classifying Acute Pain Conditions. *J Pain* 2017;**18**:479–89. doi:10.1016/j.jpain.2017.02.421
- 8 Fan AY, Miller DW, Bolash B, *et al.* Acupuncture's Role in Solving the Opioid Epidemic: Evidence, Cost-Effectiveness, and Care Availability for Acupuncture as a Primary, Non-Pharmacologic Method for Pain Relief and Management-White Paper 2017. *J Integr Med* 2017;**15**:411–25. doi:10.1016/S2095-4964(17)60378-9
- 9 Chow SC. *Quantitative Methods for Traditional Chinese Medicine Development*. New York: : Chapman and Hall/CRC Press, Taylor & Francis 2015.
- 10 McDonald JL, Cripps AW, Smith PK. Mediators, Receptors, and Signalling Pathways in the Anti-Inflammatory and Antihyperalgesic Effects of Acupuncture. *Evid Based Complement Alternat Med* 2015;**2015**:975632. doi:10.1155/2015/975632
- 11 Jan AL, Aldridge ES, Rogers IR, *et al.* Review article: Does acupuncture have a role in providing analgesia in the emergency setting? A systematic review and meta-analysis. *Emerg Med Australas* 2017;**29**:490–8. doi:10.1111/1742-6723.12832
- 12 Chia KL, Lam RPK, Lam CK, *et al.* Acupuncture in the emergency department: a systematic review of randomised controlled trials. *Acupunct Med* 2018;**36**:183–92. doi:10.1136/acupmed-2017-011547
- 13 Grissa MH, Baccouche H, Boubaker H, *et al.* Acupuncture vs intravenous morphine in the management of acute pain in the ED. *Am J Emerg Med* 2016;**34**:2112–6. doi:10.1016/j.ajem.2016.07.028
- 14 Goertz CMH, Niemtow R, Burns SM, *et al.* Auricular acupuncture in the treatment of acute pain syndromes: A pilot study. *Mil Med* 2006;**171**:1010–4. doi:10.7205/MILMED.171.10.1010
- 15 Kligler B, Nielsen A, Kohrherr C, *et al.* Acupuncture therapy in a group setting for chronic

- 1  
2  
3 pain. *Pain Med* 2018;**19**:393–403. doi:10.1093/pm/pnx134
- 4 16 Baker K, McDonald J, Steel A. Tackling health inequity: a commentary on the potential of  
5 acupuncture to improve health outcomes of marginalised populations. *Acupunct Med*  
6 2020;:964528420961404. doi:10.1177/0964528420961404
- 7  
8 17 Zheng J, Chow S-C. Criteria for dose-finding in two-stage seamless adaptive design. *J*  
9 *Biopharm Stat* 2019;**29**:908–19. doi:10.1080/10543406.2019.1657130
- 10  
11 18 McLeod D, Nelson K. The role of the emergency department in the acute management of  
12 chronic or recurrent pain. *Australas Emerg Nurs J* 2013;**16**:30–6.  
13 doi:10.1016/j.aenj.2012.12.001
- 14 19 Niemtzw RC. Battlefield Acupuncture. *Med Acupunct* 2007;**19**:225–8.  
15 doi:10.1089/acu.2007.0603
- 16 20 Federman DG, Zeliadt SB, Thomas ER, *et al*. Battlefield acupuncture in the veterans health  
17 administration: effectiveness in individual and group settings for pain and pain  
18 comorbidities. *Med Acupunct* 2018;**30**:273–8. doi:10.1089/acu.2018.1296
- 19  
20 21 Hempel S, Taylor SL, Solloway MR, *et al*. *Evidence map of acupuncture*. Washington (DC):  
21 : Department of Veterans Affairs 2014.
- 22 22 North Carolina Acupuncture Licensing Board. General Information: Fundamental  
23 Information About Acupuncture. North Carolina Acupuncture Licensing Board Website.  
24 <https://www.ncalb.com/general-information/> (accessed 31 Mar2021).
- 25  
26 23 MacPherson H, Altman DG, Hammerschlag R, *et al*. Revised STandards for Reporting  
27 Interventions in Clinical Trials of Acupuncture (STRICTA): Extending the CONSORT  
28 statement. *J Evid Based Med* 2010;**3**:140–55. doi:10.1111/j.1756-5391.2010.01086.x
- 29  
30 24 Weidenhammer W, Streng A, Linde K, *et al*. Acupuncture for chronic pain within the  
31 research program of 10 German Health Insurance Funds--basic results from an  
32 observational study. *Complement Ther Med* 2007;**15**:238–46.  
33 doi:10.1016/j.ctim.2006.09.005
- 34  
35 25 Cella D, Riley W, Stone A, *et al*. The Patient-Reported Outcomes Measurement Information  
36 System (PROMIS) developed and tested its first wave of adult self-reported health outcome  
37 item banks: 2005-2008. *J Clin Epidemiol* 2010;**63**:1179–94.  
38 doi:10.1016/j.jclinepi.2010.04.011
- 39  
40 26 Cella D, Lai JS, Nowinski CJ, *et al*. Neuro-QOL: brief measures of health-related quality of  
41 life for clinical research in neurology. *Neurology* 2012;**78**:1860–7.  
42 doi:10.1212/WNL.0b013e318258f744
- 43  
44 27 Hahn EA, DeWalt DA, Bode RK, *et al*. New English and Spanish social health measures  
45 will facilitate evaluating health determinants. *Health Psychol* 2014;**33**:490–9.  
46 doi:10.1037/hea0000055
- 47  
48 28 Humeniuk R, Henry-Edwards S, Ali R, *et al*, editors. *The Alcohol, Smoking and Substance*  
49 *Involvement Screening Test (ASSIST): Manual for use in primary care*. 2010.  
50 [https://www.who.int/substance\\_abuse/publications/assist/en/](https://www.who.int/substance_abuse/publications/assist/en/) (accessed 2 Dec2019).
- 51  
52 29 Krebs EE, Lorenz KA, Bair MJ, *et al*. Development and initial validation of the PEG, a three-  
53 item scale assessing pain intensity and interference. *J Gen Intern Med* 2009;**24**:733–8.  
54 doi:10.1007/s11606-009-0981-1
- 55  
56 30 Von Korff M, DeBar LL, Krebs EE, *et al*. Graded chronic pain scale revised: mild,  
57 bothersome, and high-impact chronic pain. *Pain* 2020;**161**:651–61.  
58  
59

- doi:10.1097/j.pain.0000000000001758
- 31 George SZ, Beneciuk JM, Bialosky JE, *et al.* Development of a Review-of-Systems Screening Tool for Orthopaedic Physical Therapists: Results From the Optimal Screening for Prediction of Referral and Outcome (OSPRO) Cohort. *J Orthop Sports Phys Ther* 2015;**45**:512–26. doi:10.2519/jospt.2015.5900
- 32 George SZ, Beneciuk JM, Lentz TA, *et al.* Optimal screening for prediction of referral and outcome (OSPRO) for musculoskeletal pain conditions: results from the validation cohort. *J Orthop Sports Phys Ther* 2018;**48**:460–75. doi:10.2519/jospt.2018.7811
- 33 Lentz TA, Beneciuk JM, Bialosky JE, *et al.* Development of a yellow flag assessment tool for orthopaedic physical therapists: results from the optimal screening for prediction of referral and outcome (OSPRO) cohort. *J Orthop Sports Phys Ther* 2016;**46**:327–43. doi:10.2519/jospt.2016.6487
- 34 Cohen S, Kamarck T, Mermelstein R. A global measure of perceived stress. *J Health Soc Behav* 1983;**24**:385–96. doi:10.2307/2136404
- 35 Jensen MP, Keefe FJ, Lefebvre JC, *et al.* One- and two-item measures of pain beliefs and coping strategies. *Pain* 2003;**104**:453–69. doi:10.1016/S0304-3959(03)00076-9
- 36 Nicholas MK. The pain self-efficacy questionnaire: Taking pain into account. *Eur J Pain* 2007;**11**:153–63. doi:10.1016/j.ejpain.2005.12.008
- 37 Cruz-Almeida Y, Fillingim RB. Can quantitative sensory testing move us closer to mechanism-based pain management? *Pain Med* 2014;**15**:61–72. doi:10.1111/pme.12230
- 38 Persson AL, Brogårdh C, Sjölund BH. Tender or not tender: test-retest repeatability of pressure pain thresholds in the trapezius and deltoid muscles of healthy women. *J Rehabil Med* 2004;**36**:17–27. doi:10.1080/16501970310015218
- 39 Harris PA, Taylor R, Thielke R, *et al.* Research electronic data capture (REDCap)--a metadata-driven methodology and workflow process for providing translational research informatics support. *J Biomed Inform* 2009;**42**:377–81. doi:10.1016/j.jbi.2008.08.010
- 40 Chow SC, Chang M. *Adaptive Design Methods in Clinical Trials*. 2nd ed. New York: : Chapman and Hall/CRC Press, Taylor & Francis 2011.
- 41 Chow S-C, Wang H, Shao J. *Sample size calculations in clinical research*. Chapman and Hall/CRC 2007. doi:10.1201/9781584889830
- 42 Gallagher EJ, Liebman M, Bijur PE. Prospective validation of clinically important changes in pain severity measured on a visual analog scale. *Ann Emerg Med* 2001;**38**:633–8. doi:10.1067/mem.2001.118863
- 43 Chan A-W, Tetzlaff JM, Gøtzsche PC, *et al.* SPIRIT 2013 explanation and elaboration: guidance for protocols of clinical trials. *BMJ* 2013;**346**:e7586. doi:10.1136/bmj.e7586
- 44 Chow S-C. Adaptive clinical trial design. *Annu Rev Med* 2014;**65**:405–15. doi:10.1146/annurev-med-092012-112310
- 45 Becker WC, Dorflinger L, Edmond SN, *et al.* Barriers and facilitators to use of non-pharmacological treatments in chronic pain. *BMC Fam Pract* 2017;**18**:41. doi:10.1186/s12875-017-0608-2
- 46 Thomas ER, Zeliadt SB, Coggeshall S, *et al.* Does offering battlefield acupuncture lead to subsequent use of traditional acupuncture? *Med Care* 2020;**58 Suppl 2 9S**:S108–15. doi:10.1097/MLR.0000000000001367
- 47 Council of Colleges of Acupuncture and Oriental Medicine. *Clean Needle Technique*

- 1  
2  
3 *Manual*. 7th ed. United States: 2020. [https://www.ccaom.org/ccaom/CNT\\_Manual.asp](https://www.ccaom.org/ccaom/CNT_Manual.asp)  
4 (accessed 6 Apr2021).  
5  
6 48 Dorsher PT. Myofascial referred-pain data provide physiologic evidence of acupuncture  
7 meridians. *J Pain* 2009;**10**:723–31. doi:10.1016/j.jpain.2008.12.010  
8  
9 49 Nielsen A, Anderson B, Citkovitz C, *et al*. Developing and employing a “responsive  
10 manualization” in the “Acupuncture Approaches to Decrease Disparities in Outcomes of  
11 Pain Treatment” comparative effectiveness study. *Acupunct Med* 2019;**37**:184–91.  
12 doi:10.1177/0964528419834015  
13  
14 50 Lee WW, Burelbach AE, Fosnocht D. Hispanic and non-Hispanic white patient pain  
15 management expectations. *Am J Emerg Med* 2001;**19**:549–50.  
16 doi:10.1053/ajem.2001.28038  
17  
18 51 Hoppe JA, McStay C, Sun BC, *et al*. Emergency department attending physician variation  
19 in opioid prescribing in low acuity back pain. *West J Emerg Med* 2017;**18**:1135–42.  
20 doi:10.5811/westjem.2017.7.33306  
21  
22  
23  
24  
25  
26  
27  
28  
29  
30  
31  
32  
33  
34  
35  
36  
37  
38  
39  
40  
41  
42  
43  
44  
45  
46  
47  
48  
49  
50  
51  
52  
53  
54  
55  
56  
57  
58  
59  
60

1  
2  
3 **Figure captions:**  
4

5 **Figure 1.** Trial flowchart. After interim analysis in Stage 1, the less effective  
6 acupuncture arm will be dropped.  
7  
8  
9

10 **Appendix 1.** Example informed consent form  
11  
12  
13  
14  
15  
16  
17  
18  
19  
20  
21  
22  
23  
24  
25  
26  
27  
28  
29  
30  
31  
32  
33  
34  
35  
36  
37  
38  
39  
40  
41  
42  
43  
44  
45  
46  
47  
48  
49  
50  
51  
52  
53  
54  
55  
56  
57  
58  
59  
60

For peer review only

Figure 1. Trial flowchart



**Consent to Participate in a Research Study**

Emergency Department Acupuncture for Musculoskeletal Pain Management

**CONCISE SUMMARY**

The purpose of this study is to measure how well acupuncture (the insertion of very thin needles through your skin at strategic points on your body) improves pain and function, as well as its feasibility, acceptability, and safety in the Emergency Department (ED).

If you agree to participate in this study, you will have an initial assessment with a pain threshold test, study questionnaires, and optional blood draw. You will be randomly assigned to receive either one of two types of acupuncture or no acupuncture. Acupuncture will be performed by a North Carolina Licensed Acupuncturist while in the ED. One hour after your group assignment you will complete a second pain threshold test, study questionnaires, and optional blood draw. After your ED visit, if you are assigned to acupuncture you will attend acupuncture at an outpatient clinic twice a week for 4 weeks. You will be asked to complete questionnaires at 2 and 4 weeks after your ED visit. If you are assigned no acupuncture, you will be asked not to receive any acupuncture for 4 weeks after your ED visit, and you will only complete the questionnaires. Your data and samples collected for this study may be stored and shared for future research.

Risks associated with acupuncture include pain at the site of needle insertion, bruising, and bleeding. There are risks related to loss of confidentiality, but every effort will be made to safeguard your information.

If you are interested in learning more about this study, please continue reading below.

You are being asked to take part in this research study because you presented to the Emergency Department with a musculoskeletal pain (pain that affects the muscles, bones, and/or tissues that connect them).

Research studies are voluntary and include only people who choose to take part. Please read this consent form carefully and take your time making your decision. As your study doctor or study staff discusses this consent form with you, please ask him/her to explain any words or information that you do not clearly understand. We encourage you to talk with your family and friends before you decide to take part in this research study. The nature of the study, risks, inconveniences, discomforts, and other important information about the study are listed below.

Please tell the study doctor or staff if you are taking part in another research study.

**WHO WILL BE MY DOCTOR ON THIS STUDY?**

If you decide to participate, Dr. Stephanie Eucker will be your doctor for the study and will be in contact with your regular health care provider throughout the time that you are in the study and afterwards, if needed. This study is sponsored by the Duke Endowment and the Substance Abuse and Mental Health Services Administration (SAMHSA).



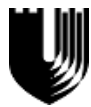

## Consent to Participate in a Research Study

Emergency Department Acupuncture for Musculoskeletal Pain Management

### WHY IS THIS STUDY BEING DONE?

Musculoskeletal pain is one of the most common reasons for doctors' office and emergency department visits. Painful episodes can lead to significant disability and ongoing disruption of daily functioning.

Acupuncture involves the insertion of very thin needles through your skin at strategic points on your body. It is not well-understood how acupuncture works, but there is some evidence that it is safe and cost-effective in outpatient settings for management of acute and chronic pain, particularly of the back, neck, and shoulder. Acupuncture is most often used to treat pain and anxiety in the clinic setting, but has not routinely been used in the ED.

The goal of this study is to measure how well acupuncture relieves pain and improves function, as well as its feasibility, acceptability, and safety in the ED.

### HOW MANY PEOPLE WILL TAKE PART IN THIS STUDY?

Approximately 750 people will take part in this study at Duke.

### WHAT IS INVOLVED IN THE STUDY?

If you agree to be in this study, you will be asked to sign and date this consent form. If you sign this form electronically, you will be asked to provide your email address so that a copy of it can be emailed to you. By providing your email address for use in the consent process, you are at potential risk for a loss of confidentiality because email is not a secure means of communication.

You will undergo an Initial Assessment that includes the following:

- Pressure Pain Threshold test. This is a non-invasive test that uses a device that applies pressure to your body (shoulder muscle) to measure the amount of pressure that causes mild pain.
- Blood draw for biomarker measurements that is optional (approximately 3-4 teaspoons)
- Completion of questionnaires

You will be randomly assigned, like drawing numbers from a hat, to one of three groups listed below. You have an equal chance of being assigned to each group and a 2 out of 3 chance of getting acupuncture.

- Ear (auricular) acupuncture – placement of needles in up to 10 sites total in both ears
- Peripheral acupuncture – placement of needles in up to 30 specific sites in the head, neck, arms from the shoulders to the hands, and legs from the knees to the feet
- Control – no acupuncture

The acupuncture treatments will be performed in an Emergency Department examination room by a North Carolina Licensed Acupuncturist. Acupuncture consists of inserting single use, sterile, acupuncture needles, measuring 0.16-0.22mm in thickness (about the thickness of a hair) and varying in length from 1.5-5cm (0.5-2 inches). The skin will be cleansed prior to needle insertion, and needles will be placed utilizing clean needle technique. Needle insertion depth will vary between 0.5 cm (0.2 inches) and 4.5 cm (1.8 inches) (through the skin and sometimes muscle layers only), depending on the area of

**Consent to Participate in a Research Study****Emergency Department Acupuncture for Musculoskeletal Pain Management**

treatment. Needles will be retained for up to 30 minutes. Auricular acupuncture needles are much smaller, 0.15 cm (0.06 inches) in length (only through the skin), attached to a bandaid adhesive so they can be retained for up to 4 days. All needles can be removed earlier at your request. All acupuncture performed adheres to the guidelines of Clean Needle Technique as required by North Carolina law.

Regardless of which group you are assigned to, you will also receive the usual care for musculoskeletal pain, including medications and other non-medication pain treatments such as ice/heat at the discretion of your ED doctor.

You will receive the usual care for acute pain management as determined by your ED doctor. If you are assigned to the control group you will not receive acupuncture. If you are assigned to one of the acupuncture groups, you will receive acupuncture in the ED. The session will last approximately 15-30 minutes.

One hour after you have been assigned to a treatment group you will be asked to complete a brief questionnaire, a pressure pain threshold test, and have an optional second blood draw (3-4 teaspoons) for research for future biomarker analysis.

Blood collection for biomarkers in this study is optional. Biomarkers are substances in the body that can be indicators of a disease. You do not have to allow for research blood draws to participate in this study. If you agree to blood collection, samples will be taken during and one hour after completion of the initial assessment in the ED.

Please initial below indicating whether or not you agree to research blood draws.

\_\_\_\_\_ Yes, I agree to undergo a blood draw for research purposes.

\_\_\_\_\_ No, I do not want to undergo a blood draw for research purposes.

If you are assigned to an acupuncture group, we will provide you with information and free access to group-based acupuncture in the outpatient Integrative Medicine clinic for the next 4 weeks. There will be two sessions per week, and each session will last approximately 30 minutes. You will be asked to provide your phone number and email address to schedule your acupuncture visits. Your name and contact information will be entered into an online scheduling program, Microsoft Bookings. This program will be used to schedule your acupuncture appointments and send appointment reminders.

If you are assigned to the control group, you will not receive acupuncture in the ED, and we ask that you not receive acupuncture for 4 weeks after you sign this consent form. Current research supports that acupuncture will still be effective in treating pain after that time, should you choose to seek acupuncture treatment after participation in the study.

**Consent to Participate in a Research Study****Emergency Department Acupuncture for Musculoskeletal Pain Management**

Regardless of which group you are assigned to, you will be asked to complete questionnaires about your pain, pain management, and quality of life at 2 and 4 weeks after your ED visit. You will receive emails at these time points with a link to the study questionnaires. If you have not completed these within a few days of receiving the email you may be contacted by a member of the study team via text message and/or phone to ensure you are able to access the link. If you have trouble with the link or prefer to answer by phone the questionnaires may be completed via phone.

You may be asked to complete an interview via phone. Interviews will be conducted by a member of the study team. We will ask you questions about your experience with the study and research study materials. This interview will last approximately 15 to 30 minutes. The interviews will be recorded. Recordings may contain your name and age. Your interview will be transcribed within 2 to 3 months and any identifying information will be deleted. Recordings will be stored until the data analysis for this study is complete, approximately 2 years, at which time they will be deleted. Recordings and transcriptions of interviews will be stored in a secure folder that only the study team has access to.

**HOW LONG WILL I BE IN THIS STUDY?**

If you agree to be in this study, your participation will last approximately 4 weeks. You can choose to stop participating at any time without penalty or loss of any benefits to which you are entitled. However, if you decide to stop participating in the study, we encourage you to talk to your doctor first.

**WHAT ARE THE RISKS OF THE STUDY?**

Acupuncture may occasionally result in slight bruising, pain at the site of needle insertion, and bleeding, dizziness, and numbness or tingling near the needling sites that may last a few days.

Infection, excess bleeding, or fainting are also possible, although unlikely.

Risks associated with drawing blood from your arm include momentary discomfort and/or bruising. Infection, excess bleeding, clotting, or fainting are also possible, although unlikely.

There is also a risk of loss of confidentiality of your private information. Every effort will be made to protect your information, but this cannot be guaranteed. By providing your email address you are at potential risk for a loss of confidentiality because email is not a secure means of communication.

**ARE THERE BENEFITS TO TAKING PART IN THE STUDY?**

There may be direct medical benefits to you for participating in this study. If you are assigned to an acupuncture group, you may have decreased pain but that cannot be guaranteed. A potential benefit of this study is to gain knowledge that may lead to improved pain management in the ED in the future. If you are randomized to the no acupuncture group there is no expected benefit above standard of care.

**WILL MY INFORMATION BE KEPT CONFIDENTIAL?**

Participation in research involves some loss of privacy. We will do our best to make sure that information about you is kept confidential, but we cannot guarantee total confidentiality. By providing your email address for use in the consent process, you are at risk for a loss of confidentiality because



## Consent to Participate in a Research Study

### Emergency Department Acupuncture for Musculoskeletal Pain Management

email is not a secure means of communication. Your personal information may be viewed by individuals involved in this research and may be seen by people including those collaborating, funding, and regulating the study. Your date of birth, dates related to your ED visit, acupuncture visits, and any tests or procedures you have had will be collected for this study. Your name, phone number, and email address will be shared with Microsoft Bookings. We will share only the minimum necessary information in order to conduct the research. Your personal information may also be shared if required by law.

Your records may be reviewed in order to meet federal or state regulations. Reviewers may include representatives from the Food and Drug Administration, the Substance Abuse and Mental Health Services Administration (SAMHSA), the Duke University Health System Institutional Review Board, and others as appropriate. If any of these groups review your research record, they may also need to review your entire medical record.

The study results will be retained in your research record for at least six years after the study is completed.

While the information and data resulting from this study may be presented at scientific meetings or published in a scientific journal, your identity will not be revealed.

Some recipients who receive your health information might not have to follow the same privacy rules. Once your information is shared outside of DUHS, we cannot guarantee that it will remain private. If you decide to share private information with anyone not involved in the study, the federal law designed to protect your health information privacy may no longer apply to the information you have shared. Other laws may or may not protect sharing of private health information.

### WHAT ARE THE COSTS TO YOU?

You or your insurance provider will be responsible and billed for all costs related to your routine medical care, including copayments and deductibles. Routine medical care services are those that you would have received for your condition if you were not participating in this research study. Not all services are covered by insurance. The amount of your out-of-pocket expense will depend on your insurance plan.

Services and procedures that are done solely for research purposes will be paid for by the study. This includes the cost of both inpatient and outpatient acupuncture and costs related to blood draws (if applicable). Please talk with the PI/study team about the specific services and procedures that will be paid for, and the ones for which you or your insurance will be responsible.

We will monitor your DUHS patient care charges to make sure that costs are directed appropriately. If you have any questions or concerns about appropriate billing, contact your study team coordinator so that he/she can help find a resolution.

**Consent to Participate in a Research Study**

Emergency Department Acupuncture for Musculoskeletal Pain Management

**WHAT ABOUT COMPENSATION?**

You will receive a \$30 Amazon gift card after you complete the 4-week follow up survey. Gift cards may be sent via email or text message after the surveys have been completed.

**WHAT ABOUT RESEARCH RELATED INJURIES?**

Immediate necessary medical care is available at Duke University Medical Center in the event that you are injured as a direct result of your participation in this research study. However, there is no commitment by Duke University, Duke University Health System, Inc., or your Duke physicians to provide monetary compensation or free medical care to you in the event of a study-related injury.

For questions about the study or research-related injury, contact Dr. Eucker at 919-684-5537 during regular business hours and at 919-684-8111 after hours and on weekends and holidays and ask that she be paged.

**WHAT ABOUT MY RIGHTS TO DECLINE PARTICIPATION OR WITHDRAW FROM THE STUDY?**

You may choose not to be in the study, or, if you agree to be in the study, you may withdraw from the study at any time. If you withdraw from the study, no new data about you will be collected for study purposes unless the data concerns an adverse event (a bad effect) related to the study. If such an adverse event occurs, we may need to review your entire medical record. All data that has already been collected will be maintained.

Your decision not to participate or to withdraw from the study will not involve any penalty or loss of benefits to which you are entitled and will not affect your access to health care at Duke. If you do decide to withdraw from the research study, we ask that you contact Dr. Eucker in writing and let her know that you are withdrawing from the study. Her mailing address is DUMC Box 3096, Durham, NC, 27710.

We will tell you about new information that may affect your health, welfare, or willingness to stay in this study.

Your study doctor may decide to take you off this study if she determines that it is no longer in your best interest to continue.

If you agree to allow your blood to be kept for future research with identifying information that could link your sample to you, you are free to change your mind at any time. We ask that you contact Dr. Eucker in writing and let her know you are withdrawing your permission for your identifiable blood samples to be used for future research. Her mailing address is listed above. At that time, we will ask you to indicate in writing if you want the unused identifiable blood destroyed or if your samples (having all identifying information removed that would link the sample to you) could be used for other research.

Your samples and data may be stored and shared for future research without additional informed consent if identifiable private information, such as your name and medical record number, are removed. If your



# DUKE UNIVERSITY HEALTH SYSTEM

## Consent to Participate in a Research Study

### Emergency Department Acupuncture for Musculoskeletal Pain Management

identifying information is removed from your samples or data, we will no longer be able to identify and destroy them.

A description of this clinical trial will be available on <https://clinicaltrials.gov/> as required by U.S. Law. This Web site will not include information that can identify you. At most, the Web site will include a summary of the results. You can search this Web site at any time.

#### WHOM DO I CALL IF I HAVE QUESTIONS OR PROBLEMS?

For questions about the study or a research-related injury, or if you have problems, concerns, questions or suggestions about the research, contact Dr. Eucker at 919-684-5537 during regular business hours and at 919-684-8111 after hours and on weekends and holidays and ask that she be paged.

For questions about your rights as a research participant, to discuss problems, concerns or suggestions related to the research, or to obtain information or offer input about the research, contact the Duke University Health System Institutional Review Board (IRB) Office at (919) 668-5111.

#### STATEMENT OF CONSENT

"The purpose of this study, procedures to be followed, risks and benefits have been explained to me. I have been allowed to ask questions, and my questions have been answered to my satisfaction. I have been told whom to contact if I have questions, to discuss problems, concerns, or suggestions related to the research, or to obtain information or offer input about the research. I have read this consent form and agree to be in this study, with the understanding that I may withdraw at any time. I have been told that I will be given a signed and dated copy of this consent form."

\_\_\_\_\_  
Signature of Subject

\_\_\_\_\_  
Date

\_\_\_\_\_  
Time

\_\_\_\_\_  
Signature of Witness (if applicable)

\_\_\_\_\_  
Date

\_\_\_\_\_  
Time

\_\_\_\_\_  
Signature of Person Obtaining Consent

\_\_\_\_\_  
Date

\_\_\_\_\_  
Time



# Reporting checklist for protocol of a clinical trial.

Based on the SPIRIT guidelines.

## Instructions to authors

Complete this checklist by entering the page numbers from your manuscript where readers will find each of the items listed below.

Your article may not currently address all the items on the checklist. Please modify your text to include the missing information. If you are certain that an item does not apply, please write "n/a" and provide a short explanation.

Upload your completed checklist as an extra file when you submit to a journal.

In your methods section, say that you used the SPIRIT reporting guidelines, and cite them as:

Chan A-W, Tetzlaff JM, Gøtzsche PC, Altman DG, Mann H, Berlin J, Dickersin K, Hróbjartsson A, Schulz KF, Parulekar WR, Krleža-Jerić K, Laupacis A, Moher D. SPIRIT 2013 Explanation and Elaboration: Guidance for protocols of clinical trials. *BMJ*. 2013;346:e7586

|                                             |                     | Reporting Item                                                                                               | Page Number |
|---------------------------------------------|---------------------|--------------------------------------------------------------------------------------------------------------|-------------|
| <b>Administrative information</b>           |                     |                                                                                                              |             |
| Title                                       | <a href="#">#1</a>  | Descriptive title identifying the study design, population, interventions, and, if applicable, trial acronym | 1           |
| Trial registration                          | <a href="#">#2a</a> | Trial identifier and registry name. If not yet registered, name of intended registry                         | 2           |
| Trial registration: data set                | <a href="#">#2b</a> | All items from the World Health Organization Trial Registration Data Set                                     | 1-15        |
| Protocol version                            | <a href="#">#3</a>  | Date and version identifier                                                                                  | 14          |
| Funding                                     | <a href="#">#4</a>  | Sources and types of financial, material, and other support                                                  | 14-15       |
| Roles and responsibilities: contributorship | <a href="#">#5a</a> | Names, affiliations, and roles of protocol contributors                                                      | 14          |



|    |                           |                     |                                                                      |       |
|----|---------------------------|---------------------|----------------------------------------------------------------------|-------|
| 1  | Roles and                 | <a href="#">#5b</a> | Name and contact information for the trial sponsor                   | 14-15 |
| 2  | responsibilities:         |                     |                                                                      |       |
| 3  | sponsor contact           |                     |                                                                      |       |
| 4  | information               |                     |                                                                      |       |
| 5  |                           |                     |                                                                      |       |
| 6  |                           |                     |                                                                      |       |
| 7  |                           |                     |                                                                      |       |
| 8  | Roles and                 | <a href="#">#5c</a> | Role of study sponsor and funders, if any, in study design;          | 15    |
| 9  | responsibilities:         |                     | collection, management, analysis, and interpretation of data;        |       |
| 10 | sponsor and funder        |                     | writing of the report; and the decision to submit the report for     |       |
| 11 |                           |                     | publication, including whether they will have ultimate authority     |       |
| 12 |                           |                     | over any of these activities                                         |       |
| 13 |                           |                     |                                                                      |       |
| 14 |                           |                     |                                                                      |       |
| 15 |                           |                     |                                                                      |       |
| 16 | Roles and                 | <a href="#">#5d</a> | Composition, roles, and responsibilities of the coordinating centre, | 12    |
| 17 | responsibilities:         |                     | steering committee, endpoint adjudication committee, data            |       |
| 18 | committees                |                     | management team, and other individuals or groups overseeing the      |       |
| 19 |                           |                     | trial, if applicable (see Item 21a for data monitoring committee)    |       |
| 20 |                           |                     |                                                                      |       |
| 21 |                           |                     |                                                                      |       |
| 22 |                           |                     |                                                                      |       |
| 23 | <b>Introduction</b>       |                     |                                                                      |       |
| 24 |                           |                     |                                                                      |       |
| 25 | Background and            | <a href="#">#6a</a> | Description of research question and justification for undertaking   | 5     |
| 26 | rationale                 |                     | the trial, including summary of relevant studies (published and      |       |
| 27 |                           |                     | unpublished) examining benefits and harms for each intervention      |       |
| 28 |                           |                     |                                                                      |       |
| 29 |                           |                     |                                                                      |       |
| 30 | Background and            | <a href="#">#6b</a> | Explanation for choice of comparators                                | 5     |
| 31 | rationale: choice of      |                     |                                                                      |       |
| 32 | comparators               |                     |                                                                      |       |
| 33 |                           |                     |                                                                      |       |
| 34 |                           |                     |                                                                      |       |
| 35 |                           |                     |                                                                      |       |
| 36 | Objectives                | <a href="#">#7</a>  | Specific objectives or hypotheses                                    | 5     |
| 37 |                           |                     |                                                                      |       |
| 38 | Trial design              | <a href="#">#8</a>  | Description of trial design including type of trial (eg, parallel    | 6     |
| 39 |                           |                     | group, crossover, factorial, single group), allocation ratio, and    |       |
| 40 |                           |                     | framework (eg, superiority, equivalence, non-inferiority,            |       |
| 41 |                           |                     | exploratory)                                                         |       |
| 42 |                           |                     |                                                                      |       |
| 43 |                           |                     |                                                                      |       |
| 44 |                           |                     |                                                                      |       |
| 45 | <b>Methods:</b>           |                     |                                                                      |       |
| 46 | <b>Participants,</b>      |                     |                                                                      |       |
| 47 | <b>interventions, and</b> |                     |                                                                      |       |
| 48 | <b>outcomes</b>           |                     |                                                                      |       |
| 49 |                           |                     |                                                                      |       |
| 50 |                           |                     |                                                                      |       |
| 51 | Study setting             | <a href="#">#9</a>  | Description of study settings (eg, community clinic, academic        | 6     |
| 52 |                           |                     | hospital) and list of countries where data will be collected.        |       |
| 53 |                           |                     | Reference to where list of study sites can be obtained               |       |
| 54 |                           |                     |                                                                      |       |
| 55 |                           |                     |                                                                      |       |
| 56 |                           |                     |                                                                      |       |
| 57 | Eligibility criteria      | <a href="#">#10</a> | Inclusion and exclusion criteria for participants. If applicable,    | 6     |
| 58 |                           |                     | eligibility criteria for study centres and individuals who will      |       |
| 59 |                           |                     |                                                                      |       |
| 60 |                           |                     |                                                                      |       |

perform the interventions (eg, surgeons, psychotherapists)

|    |                      |                      |                                                                       |
|----|----------------------|----------------------|-----------------------------------------------------------------------|
| 1  |                      |                      |                                                                       |
| 2  |                      |                      |                                                                       |
| 3  | Interventions:       | <a href="#">#11a</a> | Interventions for each group with sufficient detail to allow          |
| 4  | description          |                      | replication, including how and when they will be administered         |
| 5  |                      |                      |                                                                       |
| 6  | Interventions:       | <a href="#">#11b</a> | Criteria for discontinuing or modifying allocated interventions for   |
| 7  | modifications        |                      | a given trial participant (eg, drug dose change in response to harms, |
| 8  |                      |                      | participant request, or improving / worsening disease)                |
| 9  |                      |                      |                                                                       |
| 10 |                      |                      |                                                                       |
| 11 | Interventions:       | <a href="#">#11c</a> | Strategies to improve adherence to intervention protocols, and any    |
| 12 | adherence            |                      | procedures for monitoring adherence (eg, drug tablet return;          |
| 13 |                      |                      | laboratory tests)                                                     |
| 14 |                      |                      |                                                                       |
| 15 |                      |                      |                                                                       |
| 16 |                      |                      |                                                                       |
| 17 | Interventions:       | <a href="#">#11d</a> | Relevant concomitant care and interventions that are permitted or     |
| 18 | concomitant care     |                      | prohibited during the trial                                           |
| 19 |                      |                      |                                                                       |
| 20 |                      |                      |                                                                       |
| 21 | Outcomes             | <a href="#">#12</a>  | Primary, secondary, and other outcomes, including the specific        |
| 22 |                      |                      | measurement variable (eg, systolic blood pressure), analysis metric   |
| 23 |                      |                      | (eg, change from baseline, final value, time to event), method of     |
| 24 |                      |                      | aggregation (eg, median, proportion), and time point for each         |
| 25 |                      |                      | outcome. Explanation of the clinical relevance of chosen efficacy     |
| 26 |                      |                      | and harm outcomes is strongly recommended                             |
| 27 |                      |                      |                                                                       |
| 28 |                      |                      |                                                                       |
| 29 |                      |                      |                                                                       |
| 30 |                      |                      |                                                                       |
| 31 | Participant timeline | <a href="#">#13</a>  | Time schedule of enrolment, interventions (including any run-ins      |
| 32 |                      |                      | and washouts), assessments, and visits for participants. A            |
| 33 |                      |                      | schematic diagram is highly recommended (see Figure)                  |
| 34 |                      |                      |                                                                       |
| 35 |                      |                      |                                                                       |
| 36 | Sample size          | <a href="#">#14</a>  | Estimated number of participants needed to achieve study              |
| 37 |                      |                      | objectives and how it was determined, including clinical and          |
| 38 |                      |                      | statistical assumptions supporting any sample size calculations       |
| 39 |                      |                      |                                                                       |
| 40 |                      |                      |                                                                       |
| 41 | Recruitment          | <a href="#">#15</a>  | Strategies for achieving adequate participant enrolment to reach      |
| 42 |                      |                      | target sample size                                                    |
| 43 |                      |                      |                                                                       |
| 44 |                      |                      |                                                                       |

## Methods: Assignment of interventions (for controlled trials)

|    |                      |                      |                                                                      |
|----|----------------------|----------------------|----------------------------------------------------------------------|
| 45 |                      |                      |                                                                      |
| 46 |                      |                      |                                                                      |
| 47 |                      |                      |                                                                      |
| 48 |                      |                      |                                                                      |
| 49 |                      |                      |                                                                      |
| 50 | Allocation: sequence | <a href="#">#16a</a> | Method of generating the allocation sequence (eg, computer-          |
| 51 | generation           |                      | generated random numbers), and list of any factors for               |
| 52 |                      |                      | stratification. To reduce predictability of a random sequence,       |
| 53 |                      |                      | details of any planned restriction (eg, blocking) should be provided |
| 54 |                      |                      | in a separate document that is unavailable to those who enrol        |
| 55 |                      |                      | participants or assign interventions                                 |
| 56 |                      |                      |                                                                      |
| 57 |                      |                      |                                                                      |
| 58 |                      |                      |                                                                      |
| 59 |                      |                      |                                                                      |
| 60 |                      |                      |                                                                      |

|    |                        |                      |                                                                       |       |
|----|------------------------|----------------------|-----------------------------------------------------------------------|-------|
| 1  | Allocation concealment | <a href="#">#16b</a> | Mechanism of implementing the allocation sequence (eg, central        | 7     |
| 2  | mechanism              |                      | telephone; sequentially numbered, opaque, sealed envelopes),          |       |
| 3  |                        |                      | describing any steps to conceal the sequence until interventions are  |       |
| 4  |                        |                      | assigned                                                              |       |
| 5  |                        |                      |                                                                       |       |
| 6  |                        |                      |                                                                       |       |
| 7  |                        |                      |                                                                       |       |
| 8  | Allocation:            | <a href="#">#16c</a> | Who will generate the allocation sequence, who will enrol             | 7     |
| 9  | implementation         |                      | participants, and who will assign participants to interventions       |       |
| 10 |                        |                      |                                                                       |       |
| 11 | Blinding (masking)     | <a href="#">#17a</a> | Who will be blinded after assignment to interventions (eg, trial      | 7     |
| 12 |                        |                      | participants, care providers, outcome assessors, data analysts), and  |       |
| 13 |                        |                      | how                                                                   |       |
| 14 |                        |                      |                                                                       |       |
| 15 |                        |                      |                                                                       |       |
| 16 |                        |                      |                                                                       |       |
| 17 | Blinding (masking):    | <a href="#">#17b</a> | If blinded, circumstances under which unblinding is permissible,      | 7     |
| 18 | emergency unblinding   |                      | and procedure for revealing a participant's allocated intervention    |       |
| 19 |                        |                      | during the trial                                                      |       |
| 20 |                        |                      |                                                                       |       |
| 21 |                        |                      |                                                                       |       |
| 22 | <b>Methods: Data</b>   |                      |                                                                       |       |
| 23 | <b>collection,</b>     |                      |                                                                       |       |
| 24 | <b>management, and</b> |                      |                                                                       |       |
| 25 | <b>analysis</b>        |                      |                                                                       |       |
| 26 |                        |                      |                                                                       |       |
| 27 |                        |                      |                                                                       |       |
| 28 |                        |                      |                                                                       |       |
| 29 | Data collection plan   | <a href="#">#18a</a> | Plans for assessment and collection of outcome, baseline, and other   | 9-10  |
| 30 |                        |                      | trial data, including any related processes to promote data quality   |       |
| 31 |                        |                      | (eg, duplicate measurements, training of assessors) and a             |       |
| 32 |                        |                      | description of study instruments (eg, questionnaires, laboratory      |       |
| 33 |                        |                      | tests) along with their reliability and validity, if known. Reference |       |
| 34 |                        |                      | to where data collection forms can be found, if not in the protocol   |       |
| 35 |                        |                      |                                                                       |       |
| 36 |                        |                      |                                                                       |       |
| 37 |                        |                      |                                                                       |       |
| 38 |                        |                      |                                                                       |       |
| 39 | Data collection plan:  | <a href="#">#18b</a> | Plans to promote participant retention and complete follow-up,        | 9-10  |
| 40 | retention              |                      | including list of any outcome data to be collected for participants   |       |
| 41 |                        |                      | who discontinue or deviate from intervention protocols                |       |
| 42 |                        |                      |                                                                       |       |
| 43 |                        |                      |                                                                       |       |
| 44 | Data management        | <a href="#">#19</a>  | Plans for data entry, coding, security, and storage, including any    | 9-10  |
| 45 |                        |                      | related processes to promote data quality (eg, double data entry;     |       |
| 46 |                        |                      | range checks for data values). Reference to where details of data     |       |
| 47 |                        |                      | management procedures can be found, if not in the protocol            |       |
| 48 |                        |                      |                                                                       |       |
| 49 |                        |                      |                                                                       |       |
| 50 |                        |                      |                                                                       |       |
| 51 | Statistics: outcomes   | <a href="#">#20a</a> | Statistical methods for analysing primary and secondary outcomes.     | 10-11 |
| 52 |                        |                      | Reference to where other details of the statistical analysis plan can |       |
| 53 |                        |                      | be found, if not in the protocol                                      |       |
| 54 |                        |                      |                                                                       |       |
| 55 |                        |                      |                                                                       |       |
| 56 | Statistics: additional | <a href="#">#20b</a> | Methods for any additional analyses (eg, subgroup and adjusted        | 11    |
| 57 | analyses               |                      | analyses)                                                             |       |
| 58 |                        |                      |                                                                       |       |
| 59 |                        |                      |                                                                       |       |
| 60 |                        |                      |                                                                       |       |

|    |                            |                      |                                                                         |       |
|----|----------------------------|----------------------|-------------------------------------------------------------------------|-------|
| 1  | Statistics: analysis       | <a href="#">#20c</a> | Definition of analysis population relating to protocol non-             | 10-11 |
| 2  | population and missing     |                      | adherence (eg, as randomised analysis), and any statistical methods     |       |
| 3  | data                       |                      | to handle missing data (eg, multiple imputation)                        |       |
| 4  |                            |                      |                                                                         |       |
| 5  |                            |                      |                                                                         |       |
| 6  | <b>Methods: Monitoring</b> |                      |                                                                         |       |
| 7  |                            |                      |                                                                         |       |
| 8  | Data monitoring:           | <a href="#">#21a</a> | Composition of data monitoring committee (DMC); summary of its          | 12    |
| 9  | formal committee           |                      | role and reporting structure; statement of whether it is independent    |       |
| 10 |                            |                      | from the sponsor and competing interests; and reference to where        |       |
| 11 |                            |                      | further details about its charter can be found, if not in the protocol. |       |
| 12 |                            |                      | Alternatively, an explanation of why a DMC is not needed                |       |
| 13 |                            |                      |                                                                         |       |
| 14 |                            |                      |                                                                         |       |
| 15 |                            |                      |                                                                         |       |
| 16 |                            |                      |                                                                         |       |
| 17 | Data monitoring:           | <a href="#">#21b</a> | Description of any interim analyses and stopping guidelines,            | 11    |
| 18 | interim analysis           |                      | including who will have access to these interim results and make        |       |
| 19 |                            |                      | the final decision to terminate the trial                               |       |
| 20 |                            |                      |                                                                         |       |
| 21 |                            |                      |                                                                         |       |
| 22 | Harms                      | <a href="#">#22</a>  | Plans for collecting, assessing, reporting, and managing solicited      | 10-12 |
| 23 |                            |                      | and spontaneously reported adverse events and other unintended          |       |
| 24 |                            |                      | effects of trial interventions or trial conduct                         |       |
| 25 |                            |                      |                                                                         |       |
| 26 |                            |                      |                                                                         |       |
| 27 | Auditing                   | <a href="#">#23</a>  | Frequency and procedures for auditing trial conduct, if any, and        | 12    |
| 28 |                            |                      | whether the process will be independent from investigators and the      |       |
| 29 |                            |                      | sponsor                                                                 |       |
| 30 |                            |                      |                                                                         |       |
| 31 |                            |                      |                                                                         |       |
| 32 |                            |                      |                                                                         |       |
| 33 | <b>Ethics and</b>          |                      |                                                                         |       |
| 34 | <b>dissemination</b>       |                      |                                                                         |       |
| 35 |                            |                      |                                                                         |       |
| 36 |                            |                      |                                                                         |       |
| 37 | Research ethics            | <a href="#">#24</a>  | Plans for seeking research ethics committee / institutional review      | 12    |
| 38 | approval                   |                      | board (REC / IRB) approval                                              |       |
| 39 |                            |                      |                                                                         |       |
| 40 |                            |                      |                                                                         |       |
| 41 | Protocol amendments        | <a href="#">#25</a>  | Plans for communicating important protocol modifications (eg,           | 12    |
| 42 |                            |                      | changes to eligibility criteria, outcomes, analyses) to relevant        |       |
| 43 |                            |                      | parties (eg, investigators, REC / IRBs, trial participants, trial       |       |
| 44 |                            |                      | registries, journals, regulators)                                       |       |
| 45 |                            |                      |                                                                         |       |
| 46 |                            |                      |                                                                         |       |
| 47 | Consent or assent          | <a href="#">#26a</a> | Who will obtain informed consent or assent from potential trial         | 6     |
| 48 |                            |                      | participants or authorised surrogates, and how (see Item 32)            |       |
| 49 |                            |                      |                                                                         |       |
| 50 |                            |                      |                                                                         |       |
| 51 | Consent or assent:         | <a href="#">#26b</a> | Additional consent provisions for collection and use of participant     | 10    |
| 52 | ancillary studies          |                      | data and biological specimens in ancillary studies, if applicable       |       |
| 53 |                            |                      |                                                                         |       |
| 54 |                            |                      |                                                                         |       |
| 55 | Confidentiality            | <a href="#">#27</a>  | How personal information about potential and enrolled participants      | 10    |
| 56 |                            |                      | will be collected, shared, and maintained in order to protect           |       |
| 57 |                            |                      | confidentiality before, during, and after the trial                     |       |
| 58 |                            |                      |                                                                         |       |
| 59 |                            |                      |                                                                         |       |
| 60 |                            |                      |                                                                         |       |

|    |                                             |                      |                                                                                                                                                                                                                                                                                     |     |
|----|---------------------------------------------|----------------------|-------------------------------------------------------------------------------------------------------------------------------------------------------------------------------------------------------------------------------------------------------------------------------------|-----|
| 1  | Declaration of interests                    | <a href="#">#28</a>  | Financial and other competing interests for principal investigators for the overall trial and each study site                                                                                                                                                                       | 15  |
| 2  |                                             |                      |                                                                                                                                                                                                                                                                                     |     |
| 3  |                                             |                      |                                                                                                                                                                                                                                                                                     |     |
| 4  |                                             |                      |                                                                                                                                                                                                                                                                                     |     |
| 5  | Data access                                 | <a href="#">#29</a>  | Statement of who will have access to the final trial dataset, and disclosure of contractual agreements that limit such access for investigators                                                                                                                                     | 10  |
| 6  |                                             |                      |                                                                                                                                                                                                                                                                                     |     |
| 7  |                                             |                      |                                                                                                                                                                                                                                                                                     |     |
| 8  |                                             |                      |                                                                                                                                                                                                                                                                                     |     |
| 9  |                                             |                      |                                                                                                                                                                                                                                                                                     |     |
| 10 | Ancillary and post trial care               | <a href="#">#30</a>  | Provisions, if any, for ancillary and post-trial care, and for compensation to those who suffer harm from trial participation                                                                                                                                                       | 12  |
| 11 |                                             |                      |                                                                                                                                                                                                                                                                                     |     |
| 12 |                                             |                      |                                                                                                                                                                                                                                                                                     |     |
| 13 |                                             |                      |                                                                                                                                                                                                                                                                                     |     |
| 14 | Dissemination policy: trial results         | <a href="#">#31a</a> | Plans for investigators and sponsor to communicate trial results to participants, healthcare professionals, the public, and other relevant groups (eg, via publication, reporting in results databases, or other data sharing arrangements), including any publication restrictions | 12  |
| 15 |                                             |                      |                                                                                                                                                                                                                                                                                     |     |
| 16 |                                             |                      |                                                                                                                                                                                                                                                                                     |     |
| 17 |                                             |                      |                                                                                                                                                                                                                                                                                     |     |
| 18 |                                             |                      |                                                                                                                                                                                                                                                                                     |     |
| 19 |                                             |                      |                                                                                                                                                                                                                                                                                     |     |
| 20 |                                             |                      |                                                                                                                                                                                                                                                                                     |     |
| 21 | Dissemination policy: authorship            | <a href="#">#31b</a> | Authorship eligibility guidelines and any intended use of professional writers                                                                                                                                                                                                      | 14  |
| 22 |                                             |                      |                                                                                                                                                                                                                                                                                     |     |
| 23 |                                             |                      |                                                                                                                                                                                                                                                                                     |     |
| 24 |                                             |                      |                                                                                                                                                                                                                                                                                     |     |
| 25 | Dissemination policy: reproducible research | <a href="#">#31c</a> | Plans, if any, for granting public access to the full protocol, participant-level dataset, and statistical code                                                                                                                                                                     | 15  |
| 26 |                                             |                      |                                                                                                                                                                                                                                                                                     |     |
| 27 |                                             |                      |                                                                                                                                                                                                                                                                                     |     |
| 28 |                                             |                      |                                                                                                                                                                                                                                                                                     |     |
| 29 | <b>Appendices</b>                           |                      |                                                                                                                                                                                                                                                                                     |     |
| 30 |                                             |                      |                                                                                                                                                                                                                                                                                     |     |
| 31 | Informed consent materials                  | <a href="#">#32</a>  | Model consent form and other related documentation given to participants and authorised surrogates                                                                                                                                                                                  | n/a |
| 32 |                                             |                      |                                                                                                                                                                                                                                                                                     |     |
| 33 |                                             |                      |                                                                                                                                                                                                                                                                                     |     |
| 34 |                                             |                      |                                                                                                                                                                                                                                                                                     |     |
| 35 | Biological specimens                        | <a href="#">#33</a>  | Plans for collection, laboratory evaluation, and storage of biological specimens for genetic or molecular analysis in the current trial and for future use in ancillary studies, if applicable                                                                                      | 9   |
| 36 |                                             |                      |                                                                                                                                                                                                                                                                                     |     |
| 37 |                                             |                      |                                                                                                                                                                                                                                                                                     |     |
| 38 |                                             |                      |                                                                                                                                                                                                                                                                                     |     |
| 39 |                                             |                      |                                                                                                                                                                                                                                                                                     |     |

## Notes:

- 13: 9-10, Figure 1 The SPIRIT Explanation and Elaboration paper is distributed under the terms of the Creative Commons Attribution License CC-BY-NC. This checklist was completed on 07. April 2021 using <https://www.goodreports.org/>, a tool made by the [EQUATOR Network](#) in collaboration with [Penelope.ai](#)
